# Supplementary material for: Transcriptomic and Metabolic Analyses Elucidate the Metabolomic Variation in Leaf Development of a Calcium-Rich Vegetable (Primulina eburnea)
Source: MDPI journal article supplement (doi:10.3390/agronomy13082157), 2023-08-17
Supplement: s1 [file s1 › Supplementary Tables.xlsx]

## Sheet: Table S1
Table S1. Information of primers used for qRT-PCR.
Gene ID	Product Length	Sense Primer	Length	Tm	Anti-sense Primer	Length	Tm
PebRAFS6	152	GCACCGTTCGGGCTAATTGACA	22	59.8	TCCAGAGACACCACTGCCAACA	22	59.8
PebMDHAR4	156	AACAGGTGCTCGGGCTTTGAAG	22	59.7	TAGCCGCCGCCAATAACAACAG	22	59.9
PebMDH8	170	AGGTGCTGCTGGTGGAATTGG	21	59	CAAGTTGCTGCTGCCCGAGAA	21	59.7
PebFLS2	185	ATCCAACGCCTCGCCACCAA	20	60.5	TCCACCTCGCTCAGAACCAACC	22	60.5
PebCHI6	192	CGACGCAGAGTCTGAAGCAACC	22	60.1	TCCAACACCGCTTCCGACAGT	21	60.1
PebCAD7	249	AGGTGAGGTGTTGGAGGTTGGA	22	59.2	GGTGCCATGCCATCGGGAATT	21	59.5
PebC4H1	138	TGCTCGGACCAGGTGTACCAAT	22	59.7	GCTTGGCATCGTGGAGGTTCAT	22	59.6
PebFK3	144	CGATGACGAATCCGCCATGACT	22	59.2	CCAGTTGTGTCCACTGCCTTCA	22	59
PebSHM12	216	TGGATTAGTTGCCGCTGGAGTT	22	58.3	TTGTGAGGACCACCTTGAAGCC	22	58.8
PebAPX2	230	AGGTGTTGTGGCAGTTGAGGTC	22	59	GCCCATCAAAGCCCGATCTCTC	22	59.4

## Sheet: Table S2
Table S2. Differentially accumulated metabolites (bud leaves vs mature leaves) statistics.
Compounds	Compounds Classification I	Compounds Classification II	Bud1	Bud2	Bud3	Bud4	Leaf1	Leaf2	Leaf3	Leaf4	Bud_vs_Leaf_VIP	Bud_vs_Leaf_P-value	Bud_vs_Leaf_Fold_Change	Bud_vs_Leaf_Log2FC	Bud_vs_Leaf_Type
DL-Methionine	Amino acids and derivatives	Amino acids and derivatives	190983	323376	156231	226676	63710.5	166677	63206.3	64918.5	1.24621	0.0257551	2.50274	-1.32351	down
L-Methionine	Amino acids and derivatives	Amino acids and derivatives	209067	351953	224051	265217	71876.7	156948	55709	44558.8	1.31672	0.0051394	3.19147	-1.67422	down
L-Homoserine	Amino acids and derivatives	Amino acids and derivatives	94518.1	171003	113588	131134	285588	402590	324308	401956	1.43379	0.00136169	2.7721	1.47098	up
L-Isoleucine*	Amino acids and derivatives	Amino acids and derivatives	3.31996e+06	4.44474e+06	2.62301e+06	2.77966e+06	1.26193e+07	1.66584e+07	1.15946e+07	1.54282e+07	1.47441	0.0013755	4.27575	2.09618	up
5-Hydroxy-L-tryptophan	Amino acids and derivatives	Amino acids and derivatives	9	9	9	9	138092	53606.6	86354.4	46023.5	1.51149	0.0305554	9002.13	13.1361	up
L-Arginine	Amino acids and derivatives	Amino acids and derivatives	278116	524755	284741	243859	668083	1.06263e+06	779234	671297	1.33355	0.00817177	2.38927	1.25657	up
L-Homocitrulline	Amino acids and derivatives	Amino acids and derivatives	158915	84300.7	70148.8	106296	266544	296233	357448	293235	1.38619	0.000349571	2.89153	1.53183	up
N-Acetyl-L-glutamic acid	Amino acids and derivatives	Amino acids and derivatives	129671	220742	106488	54515.8	244043	700064	650623	416050	1.26464	0.0328737	3.93178	1.97518	up
L-Leucine*	Amino acids and derivatives	Amino acids and derivatives	3.33112e+06	4.4173e+06	2.62e+06	2.77951e+06	1.3219e+07	6.72113e+06	1.15957e+07	1.58669e+07	1.39026	0.0187078	3.60534	1.85013	up
Trimethyllysine	Amino acids and derivatives	Amino acids and derivatives	910863	860277	653727	1.00424e+06	1.66699e+06	2.33283e+06	1.75008e+06	2.04337e+06	1.42619	0.00217458	2.27268	1.1844	up
L-Threonine	Amino acids and derivatives	Amino acids and derivatives	95251.9	172932	101427	119426	232630	361358	297327	374506	1.39271	0.00424799	2.5884	1.37206	up
L-Norleucine*	Amino acids and derivatives	Amino acids and derivatives	3.17325e+06	4.45708e+06	2.57558e+06	2.75226e+06	1.30049e+07	1.58197e+07	1.14426e+07	1.53911e+07	1.47619	0.000672218	4.29523	2.10273	up
L-Tyrosine	Amino acids and derivatives	Amino acids and derivatives	305931	387853	242532	206789	2.25435e+06	2.61433e+06	1.42532e+06	1.852e+06	1.47785	0.00572353	7.1262	2.83313	up
L-Tryptophan	Amino acids and derivatives	Amino acids and derivatives	2.81897e+06	3.36253e+06	1.47952e+06	2.29053e+06	128349	335008	104900	186541	1.46187	0.00986416	13.1844	-3.72076	down
cyclo-(Gly-Phe)	Amino acids and derivatives	Amino acids and derivatives	710431	1.3975e+06	448099	1.06724e+06	1.26663e+07	1.17557e+07	5.92364e+06	8.12234e+06	1.45176	0.0108933	10.6169	3.40829	up
L-Glutamic acid	Amino acids and derivatives	Amino acids and derivatives	2.72807e+06	5.33469e+06	3.34014e+06	2.7916e+06	6.86066e+06	1.25525e+07	6.85337e+06	8.25816e+06	1.32434	0.0246421	2.43225	1.28229	up
3,4-Dihydroxy-L-phenylalanine (L-Dopa)	Amino acids and derivatives	Amino acids and derivatives	73703.7	96466	70362.4	44301	237740	190924	131517	201055	1.36104	0.00670556	2.67257	1.41823	up
L-Valine	Amino acids and derivatives	Amino acids and derivatives	897039	1.07111e+06	833907	1.23473e+06	2.62517e+06	2.99773e+06	3.2075e+06	3.49796e+06	1.47489	0.000336709	3.05401	1.61071	up
3-Hydroxy-L-phenylalanine	Amino acids and derivatives	Amino acids and derivatives	259127	323065	225802	156094	2.03533e+06	2.62725e+06	1.36301e+06	1.98614e+06	1.47841	0.00590231	8.31016	3.05488	up
L-Proline	Amino acids and derivatives	Amino acids and derivatives	707213	1.03425e+06	613275	1.08164e+06	1.6451e+06	1.75304e+06	1.82302e+06	2.42884e+06	1.36045	0.00369274	2.22618	1.15457	up
Methyl 3-aminopropanoate	Amino acids and derivatives	Amino acids and derivatives	1.15671e+06	986736	1.31018e+06	1072375	364156	511833	703629	522562	1.38444	0.000818219	0.464468	-1.10635	down
L-Asparagine	Amino acids and derivatives	Amino acids and derivatives	9	9	9	9	28895.2	45473.7	40554.2	28503.7	1.51413	0.00350482	3984.08	11.96	up
Cyclo(Ala-Gly)	Amino acids and derivatives	Amino acids and derivatives	257658	285098	166913	141153	49452.9	78814.3	64299.2	64419.4	1.4062	0.0217902	0.302044	-1.72717	down
γ-Glutamyl-L-valine	Amino acids and derivatives	Amino acids and derivatives	9	9	9	9	4911.76	3750.92	7679.68	12790.6	1.50632	0.0363754	809.249	9.66044	up
N-Phenylacetylglycine	Amino acids and derivatives	Amino acids and derivatives	9465.68	7713.47	11634.5	4345.97	38896.1	29528.9	55963.3	30372.7	1.4001	0.0130055	4.66716	2.22254	up
N-Glycyl-L-leucine	Amino acids and derivatives	Amino acids and derivatives	9	9	9	9	50263.7	102144	65234.6	63045	1.51419	0.00812065	7796.86	12.9287	up
L-Glycyl-L-phenylalanine	Amino acids and derivatives	Amino acids and derivatives	9	9	9	9	31152	90831.4	79962.5	60758.8	1.51143	0.0152207	7297.35	12.8332	up
N-(2-Methylbenzoyl)glycine	Amino acids and derivatives	Amino acids and derivatives	9	9	9	9	18003.2	13007.8	7869.49	26009.4	1.51095	0.0246747	1802.5	10.8158	up
L-Valyl-L-Leucine	Amino acids and derivatives	Amino acids and derivatives	21616.3	25661.9	20586.3	32617.7	45549.1	73663.1	50368	41479.2	1.3353	0.0245338	2.10046	1.07071	up
L-Cystine	Amino acids and derivatives	Amino acids and derivatives	68244.6	74702.9	47885.9	68887.5	40821.7	28868.2	22532.2	17416.3	1.31622	0.00303039	2.36888	-1.24421	down
L-Glycyl-L-isoleucine	Amino acids and derivatives	Amino acids and derivatives	9	9	9	9	22036.8	74666	53164.2	60763.6	1.51054	0.0179292	5850.85	12.5144	up
N-Acetyl-L-phenylalanine	Amino acids and derivatives	Amino acids and derivatives	19748.6	10766.4	19737.6	13456.6	1826.46	9	1819.25	3592.38	1.05997	0.00558155	0.113753	-3.13603	down
2-Naphthol*	Phenolic acids	Phenolic acids	8258.89	11136.7	9832.69	11670.2	23228.1	27395.3	22735.3	38328	1.43393	0.0143214	2.73083	1.44934	up
1-O-Caffeoyl-β-D-glucose*	Phenolic acids	Phenolic acids	1.00002e+07	1.36003e+07	4.88419e+06	1.22877e+07	3.10447e+07	2.68629e+07	2.14929e+07	2.30233e+07	1.29194	0.00177893	2.51208	1.32888	up
5-(2-Hydroxyethyl)-2-O-glucosylphenol	Phenolic acids	Phenolic acids	9	9	9	9	1.67397e+06	1.36751e+06	545509	1.89422e+06	1.5137	0.0188761	152256	17.2161	up
Trans-4-Hydroxycinnamic Acid Methyl Ester	Phenolic acids	Phenolic acids	39275.3	37331	79559.4	50535.1	12285.1	19289	15900.4	11283.3	1.39124	0.0298285	0.284265	-1.81469	down
Salicylic acid	Phenolic acids	Phenolic acids	1.67119e+06	1.6698e+06	1.36121e+06	1.899e+06	612344	447667	628950	648832	1.47118	0.000858913	0.354147	-1.49758	down
6-O-Caffeoyl-D-glucose*	Phenolic acids	Phenolic acids	8.41975e+06	1.22596e+07	4.21383e+06	9.79012e+06	3.20043e+07	2.20426e+07	1.92262e+07	1.94731e+07	1.29076	0.00955023	2.67409	1.41905	up
decaffeoylverbascoside	Phenolic acids	Phenolic acids	1.55549e+06	2.58383e+06	2.24072e+06	1.78984e+06	5.85946e+06	7.50667e+06	9.94248e+06	7.81819e+06	1.4584	0.00453476	3.80994	1.92977	up
1-Naphthol*	Phenolic acids	Phenolic acids	10164.1	10279.5	8677.65	11240.9	23848.7	28257.8	22036.3	36320.5	1.45101	0.0106298	2.73681	1.45249	up
Tyrosol; 4-Hydroxyphenylethanol	Phenolic acids	Phenolic acids	186601	183963	135338	205345	72115.6	45332.4	77413.2	58828.1	1.43558	0.00173689	0.356682	-1.48729	down
Verbasoside	Phenolic acids	Phenolic acids	729149	1.23938e+06	1.18712e+06	997943	3.06535e+06	3.40292e+06	4.567e+06	4.20213e+06	1.46091	0.00232264	3.66848	1.87518	up
6-O-Acetylarbutin	Phenolic acids	Phenolic acids	9	9	9	9	296192	432295	226270	552217	1.5142	0.0138251	41860.4	15.3533	up
Grevilloside G	Phenolic acids	Phenolic acids	5.74694e+06	2.82667e+06	3.54906e+06	8.56267e+06	1.79937e+07	1.09651e+07	7.00752e+06	1.35937e+07	1.15009	0.0439182	2.39591	1.26057	up
Salireposide	Phenolic acids	Phenolic acids	48867.6	101939	42710.8	83574.3	347861	279437	214567	404826	1.41366	0.00648548	4.4992	2.16967	up
3,4-dihydroxyphenylethanol-β-D-glucopyranoside	Phenolic acids	Phenolic acids	5.67345e+06	2.98322e+06	3.32954e+06	8.0944e+06	1.61556e+07	1.20186e+07	6.91565e+06	1.42363e+07	1.19105	0.0261216	2.45641	1.29655	up
Coniferin	Phenolic acids	Phenolic acids	1.00201e+07	1.28084e+07	3.89602e+06	1.23564e+07	3.15306e+07	2.32157e+07	1.81768e+07	2.35815e+07	1.20972	0.00695499	2.46935	1.30413	up
Caffeic aldehyde	Phenolic acids	Phenolic acids	271367	302190	169447	181454	88957.2	116382	148239	107204	1.28589	0.0317575	0.498436	-1.00452	down
Gallic acid-4-O-glucoside	Phenolic acids	Phenolic acids	24245.7	33484.5	23166.5	23162.2	123813	42742.6	81260	92059.6	1.34079	0.0372186	3.26618	1.7076	up
Calceolarioside B	Phenolic acids	Phenolic acids	5.15176e+07	3.16102e+07	4.14813e+07	1.63641e+07	1.19602e+08	1.0573e+08	7.80548e+07	1.14015e+08	1.31709	0.00130693	2.96086	1.56602	up
3,4-Dihydroxyphenethyl alcohol-8-O-[β-D-apinosyl(1→3)]-β-D-glucoside	Phenolic acids	Phenolic acids	9	9	9	9	71194.7	26737.8	62152.5	18200.1	1.50734	0.0416896	4952.37	12.2739	up
davidioside C	Phenolic acids	Phenolic acids	1.93399e+06	3.84322e+06	1.79488e+06	3.64076e+06	9.62092e+06	1.02234e+07	1.03133e+07	1.43052e+07	1.41962	0.00155352	3.96534	1.98745	up
1-O-p-Coumaroyl-3-O-galloyl-4,6-(S)-HHDP-β-D-glucose	Phenolic acids	Phenolic acids	61683.3	109069	47171.3	106329	262963	235760	214059	308206	1.38407	0.000645208	3.14875	1.65478	up
Desrhamnosylisoacteoside	Phenolic acids	Phenolic acids	4e+07	1.54905e+07	3.01363e+07	3.73373e+07	8.8214e+07	8.61501e+07	3.70727e+07	8.16716e+07	1.15954	0.0312031	2.38369	1.2532	up
Ferulic acid methyl ester	Phenolic acids	Phenolic acids	9823.6	5734.05	7991.83	11736	9	9	9	9	1.51374	0.0063042	0.00102025	-9.93686	down
Protocatechuic Acid Methyl Ester	Phenolic acids	Phenolic acids	84029.3	82278.8	95407.5	162755	29763.8	25623.7	23723	35015.3	1.42906	0.0258216	0.268866	-1.89504	down
4-O-(6'-O-Glucosylcaffeoyl)-3,4-dihydroxybenzoic acid	Phenolic acids	Phenolic acids	568883	482494	578879	666119	959909	1.02463e+06	1.1214e+06	1.53956e+06	1.38498	0.0165405	2.02297	1.01648	up
4-O-Glucosyl-3,4-dihydroxybenzyl alcohol	Phenolic acids	Phenolic acids	68475.6	75401.1	114455	85311.5	371976	351356	157204	537747	1.35943	0.0397708	4.1272	2.04516	up
6-O-Galloyl-β-D-glucose*	Phenolic acids	Phenolic acids	9	9	9	9	69831.5	29930.4	81040.9	35553	1.51037	0.0231948	6009.88	12.5531	up
Sinapaldehyde-4-O-Glucoside	Phenolic acids	Phenolic acids	9	9	9	9	34806.5	46810.7	57920.7	110295	1.51109	0.0329949	6939.81	12.7607	up
Isochlorogenic acid B*	Phenolic acids	Phenolic acids	2077.15	2155.37	3023.53	792.476	9	9	9	9	1.50139	0.0223277	0.00447287	-7.80458	down
6-O-Feruloyl-β-D-glucose	Phenolic acids	Phenolic acids	9	9	9	9	142765	119487	88348	273669	1.51287	0.0313767	17340.8	14.0819	up
Kelampayoside B	Phenolic acids	Phenolic acids	51799.4	66169.6	111160	32025.6	9	9	9	9	1.51023	0.0302832	0.000137849	-12.8246	down
Isolugrandoside	Phenolic acids	Phenolic acids	1.64062e+06	1.61614e+06	1.25066e+06	2.0781e+06	4.90339e+06	4.35387e+06	2.77867e+06	4.00877e+06	1.38914	0.00887139	2.43636	1.28473	up
Scroside E	Phenolic acids	Phenolic acids	7103.1	16132	19574.3	26025.6	56073.6	52353.1	46192.8	30256.8	1.24623	0.00745829	2.68579	1.42534	up
Scroside D	Phenolic acids	Phenolic acids	2.23583e+06	2.22432e+06	1.15281e+06	1.68707e+06	6.9054e+06	3.42254e+06	4.22865e+06	4.91957e+06	1.32981	0.0208241	2.66796	1.41574	up
1-O-Feruloyl-3-O-galloyl-4,6-(S)-HHDP-β-D-glucose	Phenolic acids	Phenolic acids	35437	47247.5	14619.7	16257.6	74502.5	42949.6	48156	64526.7	1.08748	0.0349327	2.02652	1.019	up
1-O-Galloyl-β-D-glucose*	Phenolic acids	Phenolic acids	9	9	9	9	39413.5	57615.3	44647.5	41968.4	1.5149	0.00146802	5101.24	12.3166	up
Caffeic acid	Phenolic acids	Phenolic acids	263339	452473	306238	313518	689875	919147	652812	829895	1.41551	0.00171035	2.31492	1.21096	up
Methyleugenol	Phenolic acids	Phenolic acids	9379.83	10358.1	1871.01	5131.68	9	9	9	9	1.5007	0.0425455	0.00134627	-9.53682	down
Forsythoside E	Phenolic acids	Phenolic acids	57676.4	60530.9	70646.3	61535	170792	229607	319371	275507	1.46535	0.00962772	3.97493	1.99093	up
Vanillic Acid-4-O-Glucuronide	Phenolic acids	Phenolic acids	256158	272439	187237	195832	9	9	9	9	1.51502	0.00175452	3.94881e-05	-14.6282	down
Benzyl β-primeveroside	Phenolic acids	Phenolic acids	5476.1	24012.7	6867.75	16759	31921.9	57626.7	66544.7	86353	1.29598	0.0184467	4.56451	2.19046	up
Hydroxytyrosol	Phenolic acids	Phenolic acids	9	9	9	9	40603.9	39608.2	31121.9	54688	1.51468	0.00341986	4611.72	12.1711	up
Helicidol	Phenolic acids	Phenolic acids	9	9	9	9	18302.7	20555.5	15810	21687.9	1.51515	0.000685781	2121	11.0505	up
Benzyl-(2''-O-xylosyl)glucoside	Phenolic acids	Phenolic acids	10978.7	31558.7	13952	12359.7	44625.2	84250.4	84220.2	51253	1.35536	0.0122805	3.83953	1.94093	up
β-Hydroxyacteoside	Phenolic acids	Phenolic acids	49311.1	37635.6	82481.6	35863.6	9	9	9	9	1.51263	0.0177189	0.00017536	-12.4774	down
Benzyl-(2''-O-glucosyl)glucoside	Phenolic acids	Phenolic acids	439429	1.40225e+06	587472	721769	1.77224e+06	3.46629e+06	2.15067e+06	3.04067e+06	1.32951	0.0110537	3.3101	1.72688	up
Dihydroxybenzoyl xyloside	Phenolic acids	Phenolic acids	9	9	9	9	49002.2	14857.3	37865	27574.2	1.50971	0.021279	3591.63	11.8104	up
Desrhamnosylacteoside	Phenolic acids	Phenolic acids	4.1569e+07	1.61013e+07	3.69584e+07	4.02195e+07	1.02451e+08	1.00079e+08	3.49545e+07	1.05169e+08	1.10432	0.0482779	2.54103	1.34541	up
Vanillic acid-4-O-glucoside	Phenolic acids	Phenolic acids	84443.9	105540	83333.4	67520.1	21333.6	19679.8	21869.4	27165.4	1.48221	0.00316123	0.264197	-1.92031	down
2'-Deoxyadenosine-5'-monophosphate	Nucleotides and derivatives	Nucleotides and derivatives	128825	173670	137779	113600	320374	388100	296030	461297	1.44117	0.00556012	2.64645	1.40406	up
5-Aminoimidazole ribonucleotide	Nucleotides and derivatives	Nucleotides and derivatives	315245	490375	693061	506483	24089.7	70311.2	62126.9	35672.4	1.44639	0.00909195	0.0958526	-3.38304	down
8-Azaguanine	Nucleotides and derivatives	Nucleotides and derivatives	29792.1	19667.2	13493.8	12809.7	59257.8	61047.1	27739.9	32618.4	1.18517	0.0494469	2.38459	1.25374	up
Uridine	Nucleotides and derivatives	Nucleotides and derivatives	12504.6	13815.8	14792.2	10618.2	25670.3	36082.7	17398.5	27156.3	1.31985	0.0342179	2.05502	1.03915	up
β-Nicotinamide mononucleotide	Nucleotides and derivatives	Nucleotides and derivatives	36817.7	56384.5	70457.3	53851.9	14947.2	20397.7	38213.4	14439	1.2593	0.0115362	0.404564	-1.30556	down
Luteolin-6,8-di-C-glucoside	Flavonoids	Flavones	284962	296403	219365	384881	85949	40803.3	98331.2	168241	1.28388	0.00430032	0.331749	-1.59184	down
Ladanetin	Flavonoids	Flavones	5.3854e+06	5.83187e+06	6.40232e+06	5.7079e+06	1.41008e+06	928605	1.22637e+06	1.34042e+06	1.49673	1.91573e-05	0.210287	-2.24957	down
Luteolin (5,7,3',4'-Tetrahydroxyflavone)	Flavonoids	Flavones	187093	181888	153583	204989	39594.1	33414.9	32520	24550.9	1.49556	0.000386273	0.178791	-2.48365	down
Kaempferol-3-O-(6''-O-acetyl)glucoside	Flavonoids	Flavonols	194369	205642	157139	265419	526474	362752	417219	362429	1.36538	0.00568244	2.02885	1.02067	up
Dihydroxy-dimethoxyflavone-7-O-glucoside	Flavonoids	Flavones	9819.72	15722.3	17221.3	20125.9	114872	54777	79033.3	67451.4	1.4419	0.0149157	5.02682	2.32965	up
Hesperetin-6-C-glucoside-7-O-glucoside	Flavonoids	Flavonols	1.73119e+06	2.79017e+06	2.52637e+06	4.11294e+06	576887	467872	721566	1.11994e+06	1.37176	0.0207461	0.25861	-1.95115	down
4',5,7-Trihydroxy-3',6-dimethoxyflavone (Jaceosidin)	Flavonoids	Flavones	73661.3	82412.8	82025.8	91551.2	17007	36349.5	25329.5	22632	1.43643	4.84158e-05	0.30735	-1.70205	down
Diosmetin (5,7,3'-Trihydroxy-4'-methoxyflavone)	Flavonoids	Flavones	277918	197548	176754	137973	77938.6	117661	82758.7	52676.2	1.29664	0.0222059	0.418929	-1.25522	down
Naringenin (5,7,4'-Trihydroxyflavanone)	Flavonoids	Flavanones	10976.3	11109.9	6562.97	15790.4	3836.97	4567.61	4890.53	6267.02	1.28074	0.0412604	0.440196	-1.18378	down
3',4'-Dihydroxy-7,5'-dimethoxyflavone	Flavonoids	Flavones	6508.77	6253.7	6461.35	5790.98	9	9	9	9	1.51514	3.97606e-05	0.00143915	-9.44057	down
Naringenin-4'-O-glucoside	Flavonoids	Flavanones	3299.2	8728.41	8174.52	14711.5	9	9	9	9	1.50295	0.0335786	0.00103112	-9.92158	down
Apigenin-6,8-di-C-glucoside (Vicenin-2)	Flavonoids	Flavones	618531	867509	1.05186e+06	932140	296212	300043	327896	387433	1.4319	0.0078588	0.377974	-1.40364	down
Isoluteolin-6,8-di-C-glucoside	Flavonoids	Flavones	116234	146710	139970	183927	34705.8	21219.3	40190.9	64647.5	1.38474	0.00126746	0.273947	-1.86803	down
6-Hydroxyluteolin 5-glucoside	Flavonoids	Flavones	356268	559568	397218	925219	969699	1.19857e+06	1.23744e+06	1.54406e+06	1.26026	0.00842564	2.21143	1.14498	up
5,2'-Dihydroxy-7,8-dimethoxyflavone glycoside	Flavonoids	Flavones	15205.2	64326.2	93795.5	83977.9	352941	135090	214024	154039	1.15888	0.0494955	3.32716	1.73429	up
Hispidulin (5,7,4'-Trihydroxy-6-methoxyflavone)	Flavonoids	Flavones	264012	245183	325034	146502	61391	120164	75329.3	44433.1	1.3276	0.0129357	0.307237	-1.70257	down
3,5,4'-Trihydroxy-7-methoxyflavone (Rhamnocitrin)	Flavonoids	Flavonols	250542	178768	160029	125733	53982	102461	66302.2	42463.5	1.32142	0.0157021	0.370884	-1.43096	down
Galangin (3,5,7-Trihydroxyflavone)	Flavonoids	Flavones	17567.5	13621.9	9197.83	14100.4	3222.04	10306.6	6792.69	6849.4	1.13153	0.0235658	0.498659	-1.00387	down
Acacetin-7-O-rutinoside (Linarin)	Flavonoids	Flavones	9	9	9	9	5127.86	2582.06	2909.99	1020.05	1.49964	0.0416256	323.333	8.33687	up
Quercetin-3-O-glucoside-7-O-rhamnoside*	Flavonoids	Flavonols	2.88585e+06	3.52003e+06	4.23439e+06	3.43987e+06	969813	2.78275e+06	1.67466e+06	1.27143e+06	1.22309	0.0108894	0.475752	-1.07172	down
Quercetin-4'-O-glucoside (Spiraeoside)	Flavonoids	Flavonols	365277	556288	398856	904731	950043	1.0392e+06	1.25056e+06	1.76244e+06	1.23576	0.0233259	2.24805	1.16867	up
Quercetin-3-O-robinobioside*	Flavonoids	Flavonols	2.67906e+06	3.35432e+06	4.35731e+06	3.02658e+06	971235	2.69523e+06	1.55585e+06	1.00109e+06	1.19923	0.0162394	0.463836	-1.10831	down
Kaempferol-6,8-di-C-glucoside	Flavonoids	Flavonols	91195	114454	99265.8	152902	28563.3	26931.3	47699.5	87603.9	1.21813	0.0146081	0.416756	-1.26272	down
Hesperetin-5-O-glucoside	Flavonoids	Flavanones	515154	623718	456186	899814	1.02212e+06	1.02703e+06	1.26258e+06	1.7386e+06	1.25991	0.0231309	2.02428	1.01741	up
6-Hydroxykaempferol-7,6-O-Diglucoside	Flavonoids	Flavonols	6.45775e+06	9.47967e+06	1.05047e+07	1.14765e+07	1.67537e+06	1.37294e+06	2.47004e+06	4.36179e+06	1.3604	0.00274279	0.260561	-1.94031	down
Taxifolin-3'-O-glucoside	Flavonoids	Flavanonols	76600.9	120712	111684	173850	248121	246522	299331	403349	1.33969	0.00941495	2.47972	1.31017	up
Scutellarein-7-O-glucuronide (Scutellarin)	Flavonoids	Flavones	722025	934270	745946	1.33484e+06	2.97759e+06	2.9982e+06	3.1502e+06	3.4748e+06	1.45809	2.55881e-05	3.37183	1.75353	up
Dihydrokaempferol-3-O-glucoside	Flavonoids	Flavanonols	97135.2	132722	120806	180226	326115	397073	311036	209919	1.34524	0.0123572	2.3435	1.22867	up
Luteolin-7-O-glucuronide	Flavonoids	Flavones	753499	931858	983016	1.05906e+06	3.40981e+06	3.15954e+06	3.26985e+06	3.2402e+06	1.50296	2.32983e-07	3.50896	1.81104	up
Ayanin (3',5-Dihydroxy-3,4',7-Trimethoxyflavone)*	Flavonoids	Flavones	1014.28	1104.1	1046.76	1251.26	2391.79	4847.97	3883.91	4411.99	1.44082	0.0133855	3.51772	1.81464	up
Quercetin-4'-O-glucuronide	Flavonoids	Flavonols	68086.9	58854.8	48324.3	60153.2	553383	1.01151e+06	762232	721803	1.49969	0.0049852	12.9511	3.695	up
Eriodictyol-5,3'-Di-O-glucoside	Flavonoids	Flavanones	119979	148828	151946	174560	35599	29671.2	29117.3	22081.6	1.48584	0.00113615	0.195643	-2.3537	down
Isoscutellarein	Flavonoids	Flavones	26848.5	29134.8	24223.7	36332.2	5607.9	7913.2	5921.34	4242.93	1.47356	0.00179542	0.203239	-2.29875	down
Eriodictyol (5,7,3',4'-Tetrahydroxyflavanone)	Flavonoids	Flavanones	13304.6	14384.8	8632.54	21217.2	2709.52	1254.65	2433.26	3335.6	1.41859	0.0177832	0.169155	-2.56358	down
Quercetin-3-O-rutinoside-7-O-rhamnoside	Flavonoids	Flavonols	12785.4	37566.7	58204	41710.6	4237.77	11298.5	7952.44	8321.08	1.26095	0.0493599	0.211689	-2.23998	down
5,7,3',5'-tetrahydroxy-6-methylfavanone	Flavonoids	Flavones	250139	186935	170329	140336	64744.9	105460	73424.9	50070.1	1.35545	0.00945873	0.392784	-1.34819	down
Rhodioflavonoside	Flavonoids	Flavonols	1.86914e+06	2.72131e+06	2.71915e+06	3.57565e+06	445572	161190	560524	1.07481e+06	1.31405	0.00354912	0.205975	-2.27946	down
Vitexin-2''-O-glucoside	Flavonoids	Flavones	96682.9	110399	123381	111134	52108.7	47582.9	49415.2	48553.9	1.49091	0.00120951	0.447604	-1.1597	down
Kaempferol-3-O-sophorotrioside	Flavonoids	Flavonols	9	9	9	9	29119.6	12651.2	24243.9	30961	1.51142	0.00977629	2693.77	11.3954	up
Dihydrocharcone-4'-O-glucoside	Flavonoids	Chalcones	4165.2	5408.3	2717.01	9342.69	9	9	9	9	1.50771	0.0320752	0.00166411	-9.23103	down
Quercetin-3-O-(4''-O-glucosyl)rhamnoside*	Flavonoids	Flavonols	2.5312e+06	3.5708e+06	4.39929e+06	3.78192e+06	1.29403e+06	2.95266e+06	1.74363e+06	984198	1.15925	0.02026	0.488302	-1.03416	down
Quercetin-3,7-Di-O-glucoside	Flavonoids	Flavonols	24921	30576.9	24435.1	42374.6	9	9	9	9	1.51376	0.00525306	0.00029434	-11.7302	down
Quercetin-3-O-(2''-O-Rhamnosyl)rutinoside	Flavonoids	Flavonols	44090.5	50364.6	76796.5	30206.6	4274.53	5689.36	5669.84	7045.63	1.46817	0.0193824	0.112576	-3.15103	down
4',5-Dihydroxy-3,3',7-Trimethoxyflavone; Pachypodol*	Flavonoids	Flavones	2032.99	1807.46	1553.98	1835.42	2832.89	3501.26	3949.03	5512.96	1.3556	0.0309465	2.18485	1.12753	up
6-Hydroxykaempferol-3,7,6-O-triglycoside	Flavonoids	Flavonols	154449	146558	125140	160085	45011.3	31950.7	43114.3	52381	1.47977	0.00011706	0.294179	-1.76523	down
Dihydromyricetin (Ampelopsin)	Flavonoids	Flavanonols	18529.1	22253.3	15295.9	32934.9	37113.1	60406.4	54467.6	65883.3	1.32469	0.00707249	2.44762	1.29138	up
Kaempferol-3-O-arabinoside	Flavonoids	Flavonols	4690.69	8060.5	4915.14	14575.7	9	9	9	9	1.50717	0.0396322	0.00111656	-9.80673	down
6-C-Methylquercetin-3-O-rutinoside	Flavonoids	Flavonols	9	9	9	9	226850	510651	384829	416985	1.51393	0.00733526	42758.7	15.3839	up
5,7,3',4'-Tetrahydroxy-6-methoxyflavone-8-C-[Xylosyl-(1-2)]-glucoside	Flavonoids	Flavones	9	9	9	9	57474.8	128405	82681.9	62165.4	1.51355	0.0145374	9186.88	13.1654	up
Quercetin-5-O-glucuronide	Flavonoids	Flavonols	66499.1	121090	84245.6	212526	703410	741274	752906	814036	1.44529	9.83247e-06	6.21774	2.63639	up
Lysionotin-C-Xylosyl-glucoside	Flavonoids	Flavones	1436.57	2114.75	3610.96	1296.73	9	9	9	9	1.50457	0.0284727	0.00425582	-7.87635	down
Chrysoeriol-8-C-glucoside (Scoparin)	Flavonoids	Flavones	5.51665e+06	9.23732e+06	8.25304e+06	1.39423e+07	3.80444e+06	2.65814e+06	3.21596e+06	3.1853e+06	1.35025	0.0402245	0.348149	-1.52222	down
Persicoside	Flavonoids	Flavanones	121188	108929	116207	89391.7	9	9	9	9	1.51508	0.000572375	8.26226e-05	-13.5631	down
Xanthorin	Quinones	Anthraquinone	6.80554e+06	4.69849e+06	8.11709e+06	7.34036e+06	1.94546e+06	1.39191e+06	2.96379e+06	2.00633e+06	1.4141	0.00387845	0.308125	-1.69841	down
1,7-dihydroxy-6-methoxy-2-methylanthraquinone	Quinones	Anthraquinone	8951.94	3960.91	4489.67	8048.21	1388.6	1879.1	1885.54	1092.5	1.39871	0.0297064	0.245405	-2.02676	down
8R-Dihydrodehydrodiconferyl alcohol 4-O-β-D-glucopyranoside	Lignans and Coumarins	Lignans	1.44013e+06	1.07573e+06	1.69224e+06	1.9747e+06	434276	662146	1.08315e+06	567269	1.26643	0.0127863	0.444271	-1.17049	down
Negundin A	Lignans and Coumarins	Lignans	2.12401e+06	1.05508e+06	1.31594e+06	3.17484e+06	6.46655e+06	4.39786e+06	2.73616e+06	5.23583e+06	1.18339	0.0289013	2.45589	1.29625	up
Pinoresinol	Lignans and Coumarins	Lignans	3157.79	2468.89	2164.64	2088.24	9	9	9	9	1.51494	0.00206572	0.00364389	-8.10031	down
6,8-Dihydroxy-3-methylisocoumarin	Lignans and Coumarins	Coumarins	9	9	9	9	62356.4	35366.6	58164.3	54712.2	1.51368	0.00307272	5849.98	12.5142	up
Esculin (6,7-Dihydroxycoumarin-6-O-glucoside)	Lignans and Coumarins	Coumarins	1.99209e+06	3.4307e+06	1.61671e+06	3.29957e+06	9.0091e+06	9.95013e+06	9.60108e+06	1.26515e+07	1.43418	0.000522564	3.98603	1.99495	up
Scopoletin (7-Hydroxy-6-methoxycoumarin)	Lignans and Coumarins	Coumarins	166456	98506.9	60545.5	126684	2.1568e+06	2.03074e+06	2.25834e+06	2.32323e+06	1.48741	1.27342e-05	19.3925	4.27742	up
Daphnin	Lignans and Coumarins	Coumarins	1.84868e+06	3.26327e+06	1.55154e+06	3.49558e+06	9.32861e+06	1.02067e+07	1.01805e+07	1.29612e+07	1.4304	0.000321454	4.20087	2.07069	up
Cichoriin	Lignans and Coumarins	Coumarins	1.51771e+06	3.52577e+06	1.55117e+06	3.18728e+06	9.03107e+06	9.77489e+06	8.90201e+06	1.10542e+07	1.41608	5.98788e-05	3.96263	1.98646	up
Esculetin-7-O-glucoside	Lignans and Coumarins	Coumarins	1.77536e+06	2.90161e+06	1.48734e+06	3.279e+06	9.74655e+06	9.2214e+06	1.05264e+07	1.26212e+07	1.4434	0.000275386	4.45983	2.15699	up
1-Hydroxypineolin Diglucoside	Lignans and Coumarins	Lignans	96119.8	94431.4	71742.3	72401.6	28402.8	12072.8	21594.3	16882.2	1.44384	0.000623293	0.235893	-2.0838	down
Pyridoxine-5'-O-glucoside	Others	Vitamin	290271	408302	372750	277012	984216	998358	1.14267e+06	1.07483e+06	1.48405	7.4558e-06	3.11501	1.63924	up
2,6-Dimethyl-7-octene-2,3,6-triol	Others	Saccharides	59407.3	57532.5	50133.3	96325.6	137175	151559	151610	199309	1.38481	0.00186412	2.42846	1.28004	up
scroneoside B	Others	Others	8.85683e+06	8.28781e+06	8.92081e+06	1.33843e+07	2.43325e+07	2.32582e+07	1.49768e+07	2.36196e+07	1.36324	0.00673168	2.18473	1.12746	up
1,4-Benzodioxin-6-propanol	Others	Alcohol compounds	71962.2	72630.1	86033	41926.2	27933.2	26041.7	32454.7	32941.3	1.35063	0.0241146	0.437976	-1.19108	down
D-Pantothenic Acid	Others	Vitamin	1.09019e+07	8.98849e+06	1.18556e+07	9.17261e+06	2.63491e+06	2.8256e+06	3.18445e+06	1.80647e+06	1.47258	0.000510945	0.25542	-1.96905	down
6,8-dihydroxy-3-methyl-9-oxoxanthene-1-carboxylic acid	Others	Ketone compounds	227467	116615	170759	235468	41555.2	39275.9	83479.4	23934.7	1.35813	0.00878146	0.25089	-1.99487	down
D-Sorbitol	Others	Saccharides	170256	222592	359992	205817	65742.8	101680	80353.9	66594.6	1.38558	0.0279178	0.327929	-1.60855	down
Erythrose	Others	Saccharides	383983	273770	373008	352743	9	9	9	9	1.51519	0.000806906	2.60209e-05	-15.23	down
Hydroxydihydrobovolide	Others	Lactones	84305.8	170682	108301	143117	226284	372213	281791	349408	1.35398	0.00583332	2.42829	1.27994	up
Lactobiose	Others	Saccharides	873674	1.39454e+06	1.80194e+06	968445	525172	535344	446197	498085	1.35395	0.0373136	0.397888	-1.32956	down
D-Mannose	Others	Saccharides	1.38014e+06	2.3124e+06	1.36678e+06	1.33089e+06	5.04771e+06	4.45266e+06	2.80147e+06	2.82748e+06	1.32186	0.0241869	2.36758	1.24341	up
Gluconic acid	Others	Saccharides	137126	111034	114653	110209	266979	444004	191755	305137	1.36321	0.0391903	2.55353	1.35249	up
Riboflavin (Vitamin B2)	Others	Vitamin	226804	206541	171849	110115	69553.8	92736.3	47526.5	70204.3	1.32071	0.0180591	0.391468	-1.35303	down
L-Fucitol	Others	Saccharides	159848	145213	143887	264091	370308	398269	389826	409421	1.38796	0.00339151	2.19879	1.13671	up
Dihydroxyoctanoic acid glucoside	Others	Saccharides	9	9	9	9	75383.2	96912.2	40244.4	81693.4	1.51425	0.00870942	8173.14	12.9967	up
Dulcitol	Others	Saccharides	234260	270864	417013	220129	81784.1	139465	92028.6	61102.6	1.35504	0.0179377	0.327752	-1.60932	down
Pyridoxine	Others	Vitamin	43221.8	85587.2	51502.3	52518.7	105020	117163	226059	202401	1.30435	0.0355346	2.7945	1.48259	up
1-(sn-Glycero-3-phospho)-1D-myo-inositol	Others	Saccharides	1.20618e+06	757031	1.7727e+06	1.42623e+06	530035	315889	381266	379433	1.38055	0.0223632	0.311232	-1.68394	down
D-Sucrose	Others	Saccharides	1.08815e+06	1.10048e+06	900314	914262	513332	365126	344665	375788	1.45972	0.000180397	0.399408	-1.32406	down
L-Ascorbic acid (Vitamin C)	Others	Vitamin	58424.8	68422.3	57766.2	54721.7	9	9	9	9	1.51488	0.000268612	0.000150417	-12.6987	down
Melibiose	Others	Saccharides	442542	498915	614457	340509	143615	174772	169922	168077	1.44514	0.0116156	0.346117	-1.53067	down
Galactinol	Others	Saccharides	3.1847e+06	3.01119e+06	3.74671e+06	2.13956e+06	1.45857e+06	902132	898597	1.1272e+06	1.40523	0.00614449	0.363056	-1.46173	down
2,7-Dihydroxy-1-(p-hydroxybenzyl)-4-methoxy-9,10-dihydrophenanthrene-4'-O-glucose	Others	Others	9501.1	23790.4	13005.1	15604.6	9	9	9	9	1.51063	0.0146851	0.000581573	-10.7478	down
Roseoside	Others	Ketone compounds	306643	386635	328789	301423	1.84607e+06	1.53214e+06	1.40452e+06	574394	1.36129	0.0335184	4.04772	2.01711	up
Eugenyl formate	Others	Others	33859.5	42389.8	24831.5	29906.9	234274	318016	128883	346156	1.45382	0.019096	7.84294	2.97139	up
Eucommiol	Others	Alcohol compounds	51606.1	71236.7	44314.7	81882.3	123657	132897	127324	192092	1.35534	0.00809602	2.31276	1.20962	up
3-O-caffeoyl quininyl rhamnoside	Others	Others	8374.58	34192.7	14170.6	11654.2	58057.7	62738.7	65631.2	54849.7	1.34955	0.00237667	3.52786	1.81879	up
1-phenyl-7-(4-hydroxy-3-methoxyphenyl)-4-ene-3-heptanone	Others	Ketone compounds	1184.55	7821.7	8773.71	7446.31	9	9	9	9	1.48403	0.0357386	0.00142708	-9.45271	down
D-Melezitose	Others	Saccharides	63709.6	90886	123389	97573.6	19778.6	45062.2	58720.9	39567.9	1.20992	0.0143016	0.434365	-1.20302	down
N-Acetyl-D-mannosamine	Others	Saccharides	149972	161284	171441	206331	33578.8	37802.8	91694.8	64057.9	1.36094	0.000733432	0.329644	-1.60102	down
4-Pyridoxic acid-O-glucoside	Others	Vitamin	86925.7	63536.2	86968.9	117488	233238	175221	134400	256353	1.30964	0.0209872	2.25181	1.17109	up
1-phenyl-7-(4-hydroxyphenyl)-4-ene-3-heptanone	Others	Ketone compounds	20240	33872.5	28126.6	30486.6	9	9	9	9	1.51331	0.00231171	0.000319359	-11.6125	down
Isomaltulose	Others	Saccharides	961948	1.28629e+06	1.53627e+06	910664	418678	410830	409307	412992	1.4464	0.0139026	0.351809	-1.50713	down
3,7-Dihydroxychromen-4-one	Others	Chromone	28385.7	92208	44479.4	135687	212856	232096	204673	489088	1.25318	0.0483708	3.78612	1.92072	up
Isonicotinic acid	Others	Vitamin	236462	179793	203142	183951	97961.8	57663.3	140562	95890.7	1.30046	0.0035103	0.488055	-1.03489	down
DMelezitose O-rhamnoside	Others	Saccharides	89099.7	45780.5	44149.5	37272.6	111078	217733	246151	125127	1.30118	0.0301947	3.23663	1.69449	up
4-Pyridoxic acid	Others	Vitamin	9	9	9	9	23329	11466.2	22468.1	11385.3	1.51113	0.0140267	1906.91	10.897	up
1,6-anhydro-β-D-glucose	Others	Saccharides	44626.6	50155.1	25423.1	28374.8	100712	108550	81040.6	68654.1	1.33706	0.00431862	2.41592	1.27257	up
D-Trehalose	Others	Saccharides	627611	729934	981781	495237	244828	219674	202307	213650	1.43755	0.0173316	0.310616	-1.6868	down
2,6-Dimethoxyhydroquinone-1-O-glucoside	Others	Others	9	9	9	9	40158.8	35983.5	42847.1	23384.1	1.51369	0.00371526	3954.82	11.9494	up
N-Acetyl-D-glucosamine-1-phosphate	Others	Saccharides	13721.3	16258.8	18154.6	16701.2	9	9	9	9	1.5143	0.000402897	0.000555247	-10.8146	down
Piperidine	Alkaloids	Piperidine alkaloids	76914.6	106706	64076.3	42408.9	287769	302669	197006	266933	1.41286	0.00103539	3.63445	1.86174	up
naphthisoxazol A	Alkaloids	Alkaloids	149815	326831	105406	231221	2.86663e+06	3.18171e+06	1.43301e+06	2.01396e+06	1.45634	0.0115342	11.6754	3.5454	up
1-Methoxy-indole-3-acetamide	Alkaloids	Plumerane	673857	1.38648e+06	452158	957611	1.11939e+07	1.08501e+07	5.50946e+06	8.06952e+06	1.45598	0.00826125	10.2657	3.35975	up
3-amino-2-naphthoic acid	Alkaloids	Alkaloids	133291	297666	112327	198438	2.40185e+06	2.51906e+06	1.42962e+06	1.74337e+06	1.47245	0.0052068	10.9123	3.44788	up
6-Hydroxynicotinic acid	Alkaloids	Pyridine alkaloids	105017	46985.9	56280.3	146809	222271	114537	304456	341924	1.13859	0.0445081	2.76883	1.46927	up
3-Indoleacrylic acid	Alkaloids	Plumerane	132665	327036	105463	210918	2.36577e+06	2.48739e+06	1.17149e+06	1.71726e+06	1.45017	0.00967182	9.97562	3.31841	up
N-Acetylisatin	Alkaloids	Plumerane	977474	848225	767997	1.07419e+06	2.28924e+06	1.52693e+06	2.36543e+06	3.32249e+06	1.36611	0.0265531	2.59116	1.3736	up
N-(2-Hydroxy-4-methoxyphenyl)acetamide	Alkaloids	Phenolamine	217066	247444	172524	169633	1.68734e+06	1.95623e+06	1.11016e+06	1.6795e+06	1.49367	0.00397122	7.97508	2.9955	up
Angustoline	Alkaloids	Plumerane	1.34221e+06	2.07271e+06	1.67948e+06	1.08549e+06	3.8339e+06	4292620	4.38371e+06	5.21212e+06	1.43437	0.000288438	2.86774	1.51991	up
Indole-3-carboxaldehyde	Alkaloids	Plumerane	24224	44555.4	26526.3	44326.6	331844	286423	152159	187581	1.45437	0.0155171	6.86094	2.77841	up
Choline	Alkaloids	Alkaloids	9.32627e+06	9.58985e+06	1.18349e+07	1.05651e+07	3.38867e+06	5.00481e+06	6.66268e+06	5.23496e+06	1.35907	0.00108049	0.491118	-1.02586	down
Methoxyindoleacetic acid	Alkaloids	Plumerane	13543.5	32850.5	13042.5	26657.8	272739	299527	132321	190951	1.45479	0.0124374	10.4019	3.37877	up
O-Phosphocholine	Alkaloids	Alkaloids	790277	769152	1.46546e+06	694841	238865	295100	347050	326153	1.39301	0.0383852	0.324531	-1.62357	down
1-Methylhistamine	Alkaloids	Alkaloids	63753.7	43865.9	25717.8	63077.3	275589	300990	384943	362146	1.45003	0.000681348	6.73915	2.75257	up
2,4-Dihydroxyquinoline	Alkaloids	Quinoline alkaloids	11772.7	11608.7	17987.1	19437.7	57579.2	61891.7	27523.1	58865.2	1.3756	0.0171074	3.3855	1.75937	up
3-Hydroxyanthranilic acid	Alkaloids	Phenolamine	9	9	9	9	43129.8	47832.3	33856.2	70298.3	1.51419	0.00807089	5419.91	12.4041	up
2-Piperidone	Alkaloids	Piperidine alkaloids	9	9	9	9	44340.1	23273.6	42973.8	46672.9	1.51276	0.00535614	4368.34	12.0929	up
Spermidine	Alkaloids	Alkaloids	39468.5	32344.3	37668	29098.1	125772	187389	230300	151032	1.4727	0.0083855	5.01153	2.32525	up
Azetidine-2-carboxylic acid	Alkaloids	Alkaloids	50666.7	73039.2	39464.6	64175.4	103451	144478	105191	123524	1.35582	0.0025489	2.09656	1.06803	up
Rubianol-f	Terpenoids	Triterpene	48161.3	47825.1	336215	273960	309745	723103	577688	386095	1.07168	0.037833	2.82744	1.4995	up
Pimaradienone	Terpenoids	Ditepenoids	9	9	9	9	37725.2	15796.3	47175.2	45092.3	1.50946	0.0147532	4049.69	11.9836	up
3-Oxoolean-12-en-28-oic Acid (Oleanonic acid)	Terpenoids	Triterpene	9	9	9	9	20556.5	22892.4	19303.9	47960.5	1.51216	0.0267949	3075.37	11.5865	up
3-Oxours-12-en-28-oic acid (Ursonic Acid)	Terpenoids	Triterpene	9	9	9	9	20556.5	22892.4	19303.9	47960.5	1.51216	0.0267949	3075.37	11.5865	up
3-Oxolup-20(29)-en-28-oic acid (Betulonic acid)	Terpenoids	Triterpene	9	9	9	9	24868.3	24396.1	22338.1	51330.7	1.51269	0.0209785	3414.81	11.7376	up
Pimelic acid*	Organic acids	Organic acids	16972.1	22687.1	24043.7	24110.3	8515.26	2844.84	15563.3	12089.8	1.09835	0.0123442	0.444276	-1.17047	down
α-Ketoglutaric acid	Organic acids	Organic acids	5.87434e+06	6.01593e+06	3.7303e+06	4.37763e+06	1.57493e+07	1.35325e+07	7.43453e+06	8.76897e+06	1.27388	0.0425873	2.27447	1.18553	up
6-Aminocaproic acid	Organic acids	Organic acids	419299	484773	287245	305325	1683784	1.89313e+06	1.22333e+06	1.61761e+06	1.468	0.0016356	4.28818	2.10036	up
Azelaic acid	Organic acids	Organic acids	602983	523257	485316	875260	1.24397e+06	1.54214e+06	1.66587e+06	2.02488e+06	1.39342	0.0036434	2.60447	1.38099	up
3-Hydroxyglutaric acid	Organic acids	Organic acids	481426	464771	105624	241071	1.26252e+06	960309	438098	962838	1.11185	0.0335948	2.80283	1.48689	up
3-Methylmalic acid*	Organic acids	Organic acids	367874	292020	139632	274782	1.00053e+06	730352	398236	785532	1.24136	0.0276415	2.71304	1.43991	up
Succinic anhydride	Organic acids	Organic acids	9	9	9	9	125153	187529	152746	171987	1.51486	0.00128947	17705.9	14.1119	up
2-Methylglutaric acid*	Organic acids	Organic acids	836276	825746	1.01316e+06	1.00129e+06	117325	76994.4	202035	146881	1.47028	7.88969e-05	0.14776	-2.75867	down
Adipic Acid*	Organic acids	Organic acids	836276	825746	1.01316e+06	1.00129e+06	117325	76994.4	202035	146881	1.47028	7.88969e-05	0.14776	-2.75867	down
Iminodiacetic acid	Organic acids	Organic acids	10301.4	16358.9	19554.4	16444.8	20599.1	46040.6	33319.9	27868.1	1.21681	0.049562	2.04004	1.0286	up
Phosphoenolpyruvate	Organic acids	Organic acids	12734.3	31002.7	23009	32229.4	37509	59234.4	59759.4	62883	1.24083	0.00737317	2.21657	1.14833	up
2-Acetyl-2-Hydroxybutanoic Acid	Organic acids	Organic acids	15353	21028.5	10230.8	31449.5	43800.1	34662	34516.4	51018.9	1.19901	0.0123753	2.10087	1.07098	up
Oxalic acid	Organic acids	Organic acids	17406.3	15105	3662.74	17160.6	44953	26784.1	51141.8	40885.2	1.17749	0.0061121	3.0705	1.61847	up
Oxalacetic acid	Organic acids	Organic acids	49265.5	68249.9	31344.5	13639.9	9	9	9	9	1.50744	0.0405953	0.000221539	-12.1402	down
Phenylpyruvic acid	Organic acids	Organic acids	6110.58	8109.86	6996.11	3748	9	9	9	9	1.51168	0.00670227	0.00144205	-9.43767	down
2-Hydroxyisocaproic acid	Organic acids	Organic acids	9012.28	52154.2	62100.6	51017.9	9	9	9	9	1.49751	0.0343671	0.000206558	-12.2412	down
Methyl linolenate	Lipids	Free fatty acids	30905.2	51239.6	42109.7	60251.6	9831.32	23235.8	22777.9	11535.2	1.28359	0.0108627	0.365192	-1.45327	down
9,16-Dihydroxypalmitic acid	Lipids	Free fatty acids	183428	286203	302038	159294	122787	85260.7	127535	86096.9	1.28633	0.0327237	0.452949	-1.14258	down
9-Oxo-10E,12Z-octadecadienoic acid	Lipids	Free fatty acids	21176.4	22548.9	32538.7	13771.4	5559.3	7402.79	11994.9	6549.56	1.32238	0.025732	0.349936	-1.51484	down
Cis-5,8,11,14,17-Eicosapentaenoic Acid	Lipids	Free fatty acids	9	9	9	9	6378.36	14775.7	11401.8	12090.5	1.51211	0.00785423	1240.18	10.2763	up
LysoPE 20:3	Lipids	LPE	9	9	9	9	3534.57	2347.91	3912	3849.09	1.51243	0.00259039	378.988	8.56601	up
LysoPE 20:2	Lipids	LPE	33566.2	18813.4	21111.2	21454	8149.77	8472.8	20211.1	5302.96	1.18611	0.0305489	0.443802	-1.17201	down
LysoPE 15:0	Lipids	LPE	10404.7	26051.9	30713.5	29902.1	39974.4	54335.5	57974.2	49218	1.18616	0.00579119	2.0758	1.05367	up
Choline Alfoscerate	Lipids	PC	410535	1.03826e+06	875080	704180	105549	224783	241860	122900	1.3587	0.0190359	0.22955	-2.12312	down
Docosanoic acid (Behenic acid)	Lipids	Free fatty acids	9	9	9	9	34521	19052.9	30319.5	29649.3	1.51353	0.0032845	3153.96	11.623	up

## Sheet: Table S3
Table S3. Summary of the sequence analysis of 14 RNA-seq libraries.
Samples	Raw reads	Clean reads	Clean base	GC content (%)	Q30	reads mapped (%)
Bud1	75808768	65967608	9895141200	45	95.38	86.63
Bud2	75610680	65202528	9780379200	44.91	95.17	86.98
Bud3	87500264	74785702	11217855300	44.73	95.11	86.9
Bud4	71373232	63210382	9481557300	44.78	95.9	84.96
Leaf1	50875480	44796836	6719525400	45.58	95.64	87.95
Leaf2	67500244	63344296	9501644400	44.86	95.76	86.54
Leaf3	57047678	51842454	7776368100	45.57	96.49	82.23
Leaf4	67818564	58782388	8817358200	45.55	95.2	88.1

## Sheet: Table S4
Table S4. Statistics of TF binding sites prediction in the promoter regions of the key structural genes.
Metabolic pathway	Gene ID	AP2/ERF	HD-ZIP	MYB	bHLH	WRKY	NAC	Dof	C2H2	C3H	bZIP	Trihelix
Sugar pathway	PebFK3	2	0	4	1	21	0	0	4	0	0	0
	PebGAE1	53	0	5	1	0	0	0	1	0	0	0
	PebGAE2	1	0	9	0	2	2	0	1	0	0	0
	PebGLGA1	1	0	3	37	0	14	0	6	0	0	0
	PebGOLS1	11	0	2	0	0	21	0	0	0	0	1
	PebGOLS2	7	0	8	0	0	15	0	0	0	0	0
	PebHXK4	24	0	0	0	0	1	0	0	0	0	0
	PebINV4	42	0	54	0	0	0	0	0	0	0	2
	PebINV5	51	0	22	0	0	10	0	0	0	0	2
	PebMPI3	62	1	13	1	0	7	0	3	0	0	10
	PebMPI4	1	0	0	0	6	0	0	4	0	0	0
	PebRAFS1	12	1	4	1	14	0	0	2	0	0	0
	PebRAFS4	1	0	0	0	0	5	0	3	0	0	0
	PebSUS1	6	0	4	35	0	0	0	1	0	0	1
	PebSUS2	0	1	0	10	0	0	0	1	0	0	1
	PebSUS4	7	0	0	0	0	0	0	0	0	0	0
	PebTPS10	1	0	4	23	0	4	0	0	0	0	6
	PebTPS4	8	3	5	1	0	0	1	4	0	0	4
Amino acid pathway	PebADT1	0	0	37	2	2	0	0	0	0	0	0
	PebASNS1	0	3	5	4	0	0	3	0	0	9	0
	PebHIS1	2	0	7	0	3	2	1	0	0	0	0
	PebMDH4	12	4	1	1	0	3	8	0	0	4	0
	PebMDH7	8	0	3	0	0	0	9	0	0	0	0
	PebMS1	5	0	0	11	0	0	17	2	0	18	0
	PebMS2	19	0	8	9	0	0	4	3	0	20	0
	PebPDH1	16	0	13	1	0	0	2	2	0	0	0
	PebRPI4	6	2	1	0	0	1	1	2	0	0	0
	PebSHM7	12	0	3	0	0	5	0	4	0	1	0
Phenylpropanoid pathway	Peb4CL3	13	0	40	0	0	0	0	0	0	0	0
	Peb4CL6	99	0	0	0	11	0	0	0	0	0	0
	PebC4H1	8	1	42	1	0	1	3	0	1	0	0
	PebC4H6	36	2	22	0	0	0	5	0	0	0	0
	PebCCoAOMT1	19	0	1	0	3	1	1	0	0	0	0
	PebCOMT2	7	0	9	0	24	0	2	0	0	0	0
	PebHCT2	9	1	1	24	0	1	20	0	1	0	0
	PebPAL4	22	4	38	0	0	0	0	0	0	0	0
	PebPAL5	6	4	26	0	0	1	6	0	0	0	0
	PebPAL6	9	0	9	1	4	4	6	0	0	0	0
	PebCAD4	2	4	14	0	0	17	5	0	0	0	0
	PebCCR6	18	2	0	0	0	0	0	0	0	0	0
	PebCHI4	3	0	26	3	0	0	10	0	0	0	0
	PebCHI5	0	0	3	0	1	0	2	0	0	0	0
	PebCHS3	7	0	17	23	0	0	0	0	0	0	0
	PebF3'H1	8	0	20	36	0	1	0	0	0	0	0
	PebF3H3	0	0	8	0	0	4	1	0	0	0	0
	PebFNS1	25	0	19	5	19	0	3	0	0	0	0

## Sheet: Table S5
Table S5 Statistics of transcription factors in co-expression networks.
Pathway	ID	Cluster	TF_classification	Annotation	Function	Reference
Amino acid metabolic pathway	Peb11275	1	AP2/ERF-ERF	Dehydration-responsive element-binding protein 3 OS=Arabidopsis thaliana GN=DREB3 PE=2 SV=1	Up-regulating ASA expression; Stress-response; Proline accumulation regulation	1. Mao, J.; Miao, Z.; Wang, Z.; Yu, L.; Cai, X.; Xiang, C. Arabidopsis ERF1 Mediates Cross-Talk between Ethylene and Auxin Biosynthesis during Primary Root Elongation by Regulating ASA1 Expression. PLoS Genet 2016, 12 (1), e1005760, https://doi.org/10.1371/journal.pgen.1005760. 2. Li, J.; Guo, X.; Zhang, M.; Wang, X.; Zhao, Y.; Yin, Z.; Zhang, Z.; Wang, Y.; Xiong, H.; Zhang, H.; et al. OsERF71 Co…
	Peb07834	1	AP2/ERF-RAV	AP2/ERF and B3 domain-containing transcription repressor TEM1 OS=Arabidopsis thaliana GN=TEM1 PE=1 SV=1
	Peb13531	3	AP2/ERF-RAV	AP2/ERF and B3 domain-containing transcription factor At1g51120 OS=Arabidopsis thaliana GN=At1g51120 PE=2 SV=1
	Peb06940	4	AP2/ERF-RAV	AP2/ERF and B3 domain-containing transcription factor At1g51120 OS=Arabidopsis thaliana GN=At1g51120 PE=2 SV=1
	Peb31620	3	AP2/ERF-ERF	Ethylene-responsive transcription factor 11 OS=Arabidopsis thaliana GN=ERF11 PE=2 SV=1
	Peb16255	4	AP2/ERF-ERF	Ethylene-responsive transcription factor RAP2-7 OS=Arabidopsis thaliana GN=RAP2-7 PE=2 SV=2
	Peb30383	2	AP2/ERF-AP2	Floral homeotic protein APETALA 2 OS=Arabidopsis thaliana GN=AP2 PE=1 SV=1
	Peb14935	4	AP2/ERF-ERF	Ethylene-responsive transcription factor ERF008 OS=Arabidopsis thaliana GN=ERF008 PE=2 SV=1
	Peb06453	1	AP2/ERF-ERF	Dehydration-responsive element-binding protein 3 OS=Arabidopsis thaliana GN=DREB3 PE=2 SV=1
	Peb07861	4	AP2/ERF-ERF	Ethylene-responsive transcription factor RAP2-11 OS=Arabidopsis thaliana GN=RAP2-11 PE=2 SV=1
	Peb05911	1	AP2/ERF-ERF	Ethylene-responsive transcription factor 12 OS=Arabidopsis thaliana GN=ERF12 PE=2 SV=1
	Peb27519	1	AP2/ERF-ERF	Dehydration-responsive element-binding protein 3 OS=Arabidopsis thaliana GN=DREB3 PE=2 SV=1
	Peb00407	3	AP2/ERF-ERF	Ethylene-responsive transcription factor ERF008 OS=Arabidopsis thaliana GN=ERF008 PE=2 SV=1
	Peb20356	2	HD-ZIP	Homeobox-leucine zipper protein HDG11 OS=Arabidopsis thaliana GN=HDG11 PE=1 SV=1	Regulating proline content	4. Yu, L.; Wu, S.; Peng, Y.; Liu, R.; Chen, X.; Zhao, P.; Xu, P.; Zhu, J.; Jiao, G.; Pei, Y.; et al. Arabidopsis EDT1 / HDG11 Improves Drought and Salt Tolerance in Cotton and Poplar and Increases Cotton Yield in the Field. Plant Biotechnol J 2016, 14 (1), 72–84, https://doi.org/10.1111/pbi.12358.
	Peb18901	1	HD-ZIP	Homeobox-leucine zipper protein ATHB-15 OS=Arabidopsis thaliana GN=ATHB-15 PE=1 SV=1
	Peb00961	3	HD-ZIP	Homeobox-leucine zipper protein HOX16 OS=Oryza sativa subsp. japonica GN=HOX16 PE=2 SV=1
	Peb27346	1	HD-ZIP	Homeobox-leucine zipper protein HAT5 OS=Arabidopsis thaliana GN=HAT5 PE=1 SV=1
	Peb25239	2	HD-ZIP	Homeobox-leucine zipper protein HAT14 OS=Arabidopsis thaliana GN=HAT14 PE=2 SV=3
	Peb18122	1	HD-ZIP	Homeobox-leucine zipper protein MERISTEM L1 OS=Arabidopsis thaliana GN=ATML1 PE=2 SV=1
	Peb16519	3	HD-ZIP	Homeobox-leucine zipper protein ATHB-13 OS=Arabidopsis thaliana GN=ATHB-13 PE=2 SV=2
	Peb26501	2	HD-ZIP	Homeobox-leucine zipper protein ANTHOCYANINLESS 2 OS=Arabidopsis thaliana GN=ANL2 PE=2 SV=1
	Peb31463	2	HD-ZIP	Homeobox-leucine zipper protein MERISTEM L1 OS=Arabidopsis thaliana GN=ATML1 PE=2 SV=1
	Peb13836	1	MYB	Transcription factor MYB39 OS=Arabidopsis thaliana GN=MYB39 PE=2 SV=1	Regulating aromatic amino acids content; Regulating the accumulation of proline	5. Hu, J.; Zou, S.; Huang, J.; Huan, X.; Jin, X.; Zhou, L.; Zhao, K.; Han, Y.; Wang, S. PagMYB151 Facilitates Proline Accumulation to Enhance Salt Tolerance of Poplar. BMC Genomics 2023, 24 (1), 345, https://doi.org/10.1186/s12864-023-09459-2. 6. Dhakarey, R.; Yaritz, U.; Tian, L.; Amir, R. A Myb Transcription Factor, Pg Myb308-like, Enhances the Level of Shikimate, Aromatic Amino Acids, and Lign…
	Peb13235	2	MYB	Transcription factor AS1 OS=Arabidopsis thaliana GN=AS1 PE=1 SV=1
	Peb15330	1	MYB	Transcription repressor MYB5 OS=Arabidopsis thaliana GN=MYB5 PE=1 SV=1
	Peb16655	3	MYB	Myb-related protein 308 OS=Antirrhinum majus GN=MYB308 PE=2 SV=1
	Peb31092	4	MYB	Protein RADIALIS-like 6 OS=Arabidopsis thaliana GN=RL6 PE=2 SV=1
	Peb09724	1	ARF	Auxin response factor 8 OS=Arabidopsis thaliana GN=ARF8 PE=2 SV=2
	Peb04329	1	ARF	Auxin response factor 11 OS=Arabidopsis thaliana GN=ARF11 PE=2 SV=3
	Peb17272	4	bHLH	Transcription factor bHLH130 OS=Arabidopsis thaliana GN=BHLH130 PE=1 SV=1
	Peb24982	4	bHLH	Transcription factor bHLH63 OS=Arabidopsis thaliana GN=BHLH63 PE=1 SV=1
	Peb12426	2	bHLH	Transcription factor bHLH49 OS=Arabidopsis thaliana GN=BHLH49 PE=1 SV=1
	Peb21092	3	bHLH	Transcription factor bHLH51 OS=Arabidopsis thaliana GN=BHLH51 PE=2 SV=1
	Peb20121	2	bZIP	Transcription factor TGA4 OS=Arabidopsis thaliana GN=TGA4 PE=1 SV=2	Regulating Branched-chain amino acids synthesis	7. Sun, Y.; Shi, Y.; Liu, G.; Yao, F.; Zhang, Y.; Yang, C.; Guo, H.; Liu, X.; Jin, C.; Luo, J. Natural Variation in the OsbZIP18 Promoter Contributes to Branched‐chain Amino Acid Levels in Rice. New Phytol 2020, 228 (5), 1548–1558, https://doi.org/10.1111/nph.16800.
	Peb12956	3	bZIP	Transcription factor TGA1 OS=Arabidopsis thaliana GN=TGA1 PE=1 SV=2
	Peb02687	2	bZIP	ABSCISIC ACID-INSENSITIVE 5-like protein 4 OS=Arabidopsis thaliana GN=ABF1 PE=1 SV=1
	Peb08661	2	C2H2	Zinc finger protein 1 OS=Arabidopsis thaliana GN=ZFP1 PE=2 SV=1
	Peb09136	3	C2H2	Zinc finger protein 1 OS=Arabidopsis thaliana GN=ZFP1 PE=2 SV=1
	Peb27850	1	C2H2
	Peb05060	1	C3H	Zinc finger CCCH domain-containing protein 32 OS=Arabidopsis thaliana GN=At2g47850 PE=2 SV=2
	Peb10858	1	C3H	Zinc finger CCCH domain-containing protein 23 OS=Arabidopsis thaliana GN=At2g25900 PE=2 SV=1
	Peb07927	4	CO-like	Zinc finger protein CONSTANS-LIKE 2 OS=Arabidopsis thaliana GN=COL2 PE=1 SV=1
	Peb00284	1	CPP	Protein tesmin/TSO1-like CXC 2 OS=Arabidopsis thaliana GN=TCX2 PE=1 SV=1
	Peb28599	1	Dof	Dof zinc finger protein DOF3.7 OS=Arabidopsis thaliana GN=DOF3.7 PE=1 SV=2
	Peb26353	1	Dof	Dof zinc finger protein DOF3.4 OS=Arabidopsis thaliana GN=DOF3.4 PE=1 SV=2
	Peb08657	2	Dof	Dof zinc finger protein DOF2.1 OS=Arabidopsis thaliana GN=DOF2.1 PE=2 SV=2
	Peb30135	2	Dof	Dof zinc finger protein DOF5.6 OS=Arabidopsis thaliana GN=DOF5.6 PE=2 SV=2
	Peb05420	4	GARP	Transcription factor LUX OS=Arabidopsis thaliana GN=LUX PE=1 SV=1
	Peb27511	1	GATA	GATA transcription factor 12 OS=Arabidopsis thaliana GN=GATA12 PE=2 SV=1
	Peb04551	1	GRF	Growth-regulating factor 4 OS=Oryza sativa subsp. japonica GN=GRF4 PE=2 SV=1
	Peb26734	1	HB-BELL	BEL1-like homeodomain protein 4 OS=Arabidopsis thaliana GN=BLH4 PE=1 SV=2
	Peb28408	3	HB-BELL	BEL1-like homeodomain protein 1 OS=Arabidopsis thaliana GN=BLH1 PE=1 SV=1
	Peb30710	3	HB-BELL	Homeobox protein BEL1 homolog OS=Arabidopsis thaliana GN=BEL1 PE=1 SV=2
	Peb06271	1	HB-other	Homeobox-leucine zipper protein ATHB-52 OS=Arabidopsis thaliana GN=ATHB-52 PE=2 SV=1
	Peb22315	4	HB-other	Protein OVEREXPRESSOR OF CATIONIC PEROXIDASE 3 OS=Arabidopsis thaliana GN=OCP3 PE=1 SV=1
	Peb05646	1	LSD	Vacuolar protein sorting-associated protein 2 homolog 2 OS=Arabidopsis thaliana GN=VPS2.2 PE=1 SV=2
	Peb01336	1	MADS-MIKC	Floral homeotic protein APETALA 1 OS=Sinapis alba GN=AP1 PE=2 SV=1
	Peb19771	4	MADS-MIKC	MADS-box protein SOC1 OS=Arabidopsis thaliana GN=SOC1 PE=1 SV=1
	Peb13778	2	NAC	NAC domain-containing protein 2 OS=Arabidopsis thaliana GN=NAC002 PE=2 SV=2
	Peb13429	2	NAC	NAC domain-containing protein 7 OS=Arabidopsis thaliana GN=NAC007 PE=1 SV=2
	Peb07419	3	NAC	NAC domain-containing protein 21/22 OS=Arabidopsis thaliana GN=NAC021 PE=1 SV=2
	Peb28788	3	PLATZ
	Peb22548	1	Tify	Protein TIFY 9 OS=Arabidopsis thaliana GN=TIFY9 PE=1 SV=1
	Peb18187	1	WRKY	WRKY transcription factor 22 OS=Arabidopsis thaliana GN=WRKY22 PE=2 SV=1
	Peb07457	4	WRKY	Probable WRKY transcription factor 57 OS=Arabidopsis thaliana GN=WRKY57 PE=2 SV=1
	Peb25150	2	WRKY	Probable WRKY transcription factor 23 OS=Arabidopsis thaliana GN=WRKY23 PE=2 SV=1
	Peb20753	1	WRKY	Probable WRKY transcription factor 12 OS=Arabidopsis thaliana GN=WRKY12 PE=2 SV=1
Sugar metabolic pathway	Peb08065	1	AP2/ERF-AP2	AP2-like ethylene-responsive transcription factor ANT OS=Arabidopsis thaliana GN=ANT PE=1 SV=2	Modulating raffinose synthesis; Regulating sucrose and ethylene accumulation; Regulating soluble sugar accumulation	8. Khan, M.; Hu, J.; Dahro, B.; Ming, R.; Zhang, Y.; Wang, Y.; Alhag, A.; Li, C.; Liu, J. ERF108 from Poncirus Trifoliata (L.) Raf. Functions in Cold Tolerance by Modulating Raffinose Synthesis through Transcriptional Regulation of PtrRafS. The Plant Journal 2021, 108 (3), 705–724, https://doi.org/10.1111/tpj.15465. 9. Gao, G.; Yang, F.; Wang, C.; Duan, X.; Li, M.; Ma, Y.; Wang, F.; Qi, H. The Tr…
	Peb11275	1	AP2/ERF-ERF	Dehydration-responsive element-binding protein 3 OS=Arabidopsis thaliana GN=DREB3 PE=2 SV=1
	Peb02914	1	AP2/ERF-ERF	Ethylene-responsive transcription factor ERF034 OS=Arabidopsis thaliana GN=ERF034 PE=2 SV=2
	Peb07834	1	AP2/ERF-RAV	AP2/ERF and B3 domain-containing transcription repressor TEM1 OS=Arabidopsis thaliana GN=TEM1 PE=1 SV=1
	Peb13531	3	AP2/ERF-RAV	AP2/ERF and B3 domain-containing transcription factor At1g51120 OS=Arabidopsis thaliana GN=At1g51120 PE=2 SV=1
	Peb31583	1	AP2/ERF-RAV	AP2/ERF and B3 domain-containing transcription repressor TEM1 OS=Arabidopsis thaliana GN=TEM1 PE=1 SV=1
	Peb13427	4	AP2/ERF-ERF	Ethylene-responsive transcription factor 5 OS=Nicotiana tabacum GN=ERF5 PE=2 SV=1
	Peb28948	2	AP2/ERF-ERF	Dehydration-responsive element-binding protein 3 OS=Arabidopsis thaliana GN=DREB3 PE=2 SV=1
	Peb13891	1	AP2/ERF-AP2	AP2-like ethylene-responsive transcription factor AIL5 OS=Arabidopsis thaliana GN=AIL5 PE=2 SV=2
	Peb15918	4	AP2/ERF-ERF	Ethylene-responsive transcription factor RAP2-4 OS=Arabidopsis thaliana GN=RAP2-4 PE=1 SV=1
	Peb14935	4	AP2/ERF-ERF	Ethylene-responsive transcription factor ERF008 OS=Arabidopsis thaliana GN=ERF008 PE=2 SV=1
	Peb17952	3	AP2/ERF-ERF	Ethylene-responsive transcription factor 1B OS=Arabidopsis thaliana GN=ERF1B PE=1 SV=2
	Peb06453	1	AP2/ERF-ERF	Dehydration-responsive element-binding protein 3 OS=Arabidopsis thaliana GN=DREB3 PE=2 SV=1
	Peb23013	4	AP2/ERF-ERF	Ethylene-responsive transcription factor ERF062 OS=Arabidopsis thaliana GN=ERF062 PE=2 SV=1
	Peb24752	4	AP2/ERF-ERF	Ethylene-responsive transcription factor ERF112 OS=Arabidopsis thaliana GN=ERF112 PE=2 SV=1
	Peb24850	4	AP2/ERF-ERF	Ethylene-responsive transcription factor ERF012 OS=Arabidopsis thaliana GN=ERF012 PE=2 SV=1
	Peb05911	1	AP2/ERF-ERF	Ethylene-responsive transcription factor 12 OS=Arabidopsis thaliana GN=ERF12 PE=2 SV=1
	Peb27519	1	AP2/ERF-ERF	Dehydration-responsive element-binding protein 3 OS=Arabidopsis thaliana GN=DREB3 PE=2 SV=1
	Peb12262	3	AP2/ERF-ERF	Pathogenesis-related genes transcriptional activator PTI6 OS=Solanum lycopersicum GN=PTI6 PE=2 SV=1
	Peb25573	4	MYB	Myb-related protein 308 OS=Antirrhinum majus GN=MYB308 PE=2 SV=1	Regulating sucrose accumulation; Participates in glucose accumulation	9. Gao, G.; Yang, F.; Wang, C.; Duan, X.; Li, M.; Ma, Y.; Wang, F.; Qi, H. The Transcription Factor CmERFI-2 Represses CmMYB44 Expression to Increase Sucrose Levels in Oriental Melon Fruit. Plant Physiology 2023, 192 (2), 1378–1395, https://doi.org/10.1093/plphys/kiad155. 11. Lin, S.; Singh, R. K.; Moehninsi; Navarre, D. A. R2R3-MYB Transcription Factors, StmiR858 and Sucrose Mediate Potato Flavo…
	Peb21322	3	MYB	Transcription factor DIVARICATA OS=Antirrhinum majus GN=DIVARICATA PE=2 SV=1
	Peb30170	1	MYB	Transcription factor MYB86 OS=Arabidopsis thaliana GN=MYB86 PE=2 SV=1
	Peb00340	1	MYB	Transcription factor MYB108 OS=Arabidopsis thaliana GN=MYB108 PE=1 SV=1
	Peb14518	1	MYB	Transcription factor MYB86 OS=Arabidopsis thaliana GN=MYB86 PE=2 SV=1
	Peb15330	1	MYB	Transcription repressor MYB5 OS=Arabidopsis thaliana GN=MYB5 PE=1 SV=1
	Peb18725	1	MYB	Myb-related protein 3R-1 OS=Arabidopsis thaliana GN=MYB3R-1 PE=2 SV=1
	Peb31645	4	MYB	Protein RADIALIS-like 6 OS=Arabidopsis thaliana GN=RL6 PE=2 SV=1
	Peb24972	4	MYB	Protein RADIALIS-like 6 OS=Arabidopsis thaliana GN=RL6 PE=2 SV=1
	Peb21621	2	HD-ZIP	Homeobox-leucine zipper protein HDG1 OS=Arabidopsis thaliana GN=HDG1 PE=2 SV=1	Regulating accumulation of soluble sugars	14. Zhao, S.; Wang, H.; Jia, X.; Gao, H.; Mao, K.; Ma, F. The HD‐ZIP I Transcription Factor MDHB7 ‐like Confers Tolerance to Salinity in Transgenic Apple ( MALUS DOMESTICA ). Physiologia Plantarum 2021, 172 (3), 1452–1464, https://doi.org/10.1111/ppl.13330. 15. Hanson, J.; Johannesson, H.; Engström, P. Sugar-Dependent Alterations in Cotyledon and Leaf Development in Transgenic Plants Expressing t…
	Peb18901	1	HD-ZIP	Homeobox-leucine zipper protein ATHB-15 OS=Arabidopsis thaliana GN=ATHB-15 PE=1 SV=1
	Peb00961	3	HD-ZIP	Homeobox-leucine zipper protein HOX16 OS=Oryza sativa subsp. japonica GN=HOX16 PE=2 SV=1
	Peb27346	1	HD-ZIP	Homeobox-leucine zipper protein HAT5 OS=Arabidopsis thaliana GN=HAT5 PE=1 SV=1
	Peb19842	2	HD-ZIP	Homeobox-leucine zipper protein MERISTEM L1 OS=Arabidopsis thaliana GN=ATML1 PE=2 SV=1
	Peb04397	1	HD-ZIP	Homeobox-leucine zipper protein ROC3 OS=Oryza sativa subsp. indica GN=ROC3 PE=3 SV=2
	Peb25239	2	HD-ZIP	Homeobox-leucine zipper protein HAT14 OS=Arabidopsis thaliana GN=HAT14 PE=2 SV=3
	Peb16519	3	HD-ZIP	Homeobox-leucine zipper protein ATHB-13 OS=Arabidopsis thaliana GN=ATHB-13 PE=2 SV=2
	Peb09220	1	HD-ZIP	Homeobox-leucine zipper protein ATHB-15 OS=Arabidopsis thaliana GN=ATHB-15 PE=1 SV=1
	Peb24982	4	bHLH	Transcription factor bHLH63 OS=Arabidopsis thaliana GN=BHLH63 PE=1 SV=1	Modulates soluble sugar	16. Yu, J.; Gu, K.; Zhang, L.; Sun, C.; Zhang, Q.; Wang, J.; Wang, C.; Wang, W.; Du, M.; Hu, D. MdbHLH3 Modulates Apple Soluble Sugar Content by Activating Phosphofructokinase Gene Expression. Journal of Integrative Plant Biology 2022, 64 (4), 884–900, https://doi.org/10.1111/jipb.13236. 17. Zhang, S.; Wang, H.; Wang, T.; Liu, W.; Zhang, J.; Fang, H.; Zhang, Z.; Peng, F.; Chen, X.; Wang, N. MDMYB…
	Peb23492	2	bHLH	Transcription factor ICE1 OS=Arabidopsis thaliana GN=SCRM PE=1 SV=1
	Peb13770	2	bHLH	Transcription factor ICE1 OS=Arabidopsis thaliana GN=SCRM PE=1 SV=1
	Peb09796	4	bHLH	Transcription factor PIF5 OS=Arabidopsis thaliana GN=PIF5 PE=1 SV=1
	Peb24909	2	bHLH	Transcription factor bHLH79 OS=Arabidopsis thaliana GN=BHLH79 PE=2 SV=1
	Peb10086	1	bHLH	Transcription factor bHLH35 OS=Arabidopsis thaliana GN=BHLH35 PE=2 SV=1
	Peb21092	3	bHLH	Transcription factor bHLH51 OS=Arabidopsis thaliana GN=BHLH51 PE=2 SV=1
	Peb31677	1	bHLH	Transcription factor bHLH74 OS=Arabidopsis thaliana GN=BHLH74 PE=1 SV=1
	Peb19829	2	ARF	Auxin response factor 3 OS=Arabidopsis thaliana GN=ARF3 PE=1 SV=2
	Peb10957	2	ARF	Auxin response factor 9 OS=Arabidopsis thaliana GN=ARF9 PE=1 SV=1
	Peb27791	2	ARF	Auxin response factor 17 OS=Arabidopsis thaliana GN=ARF17 PE=2 SV=1
	Peb15384	2	BES	Protein BRASSINAZOLE-RESISTANT 1 OS=Arabidopsis thaliana GN=BZR1 PE=1 SV=1
	Peb15432	2	Bzip	Transcription factor RF2b OS=Oryza sativa subsp. japonica GN=RF2b PE=1 SV=2	Regulating trehalose content; Regulating soluble sugar content	18. Shu, Y.; Zhang, W.; Tang, L.; Li, Z.; Liu, X.; Liu, X.; Liu, W.; Li, G.; Ying, J.; Huang, J.; Tong, X.; Hu, H.; Zhang, J.; Wang, Y. ABF1 Positively Regulates Rice Chilling Tolerance via Inducing Trehalose Biosynthesis. International Journal of Molecular Sciences 2023, 24 (13), 11082, https://doi.org/10.3390/ijms241311082. 19. Zhang, L.; Zhao, L.; Wang, L.; Liu, X.; Yu, Z.; Liu, J.; Wu, W.; Di…
	Peb27807	2	Bzip	Transcription factor RF2b OS=Oryza sativa subsp. japonica GN=RF2b PE=1 SV=2
	Peb23271	2	C2H2	Protein indeterminate-domain 12 OS=Arabidopsis thaliana GN=IDD12 PE=2 SV=2	Regulation of GolS gene expression	20. Zhang, H.; Sun, Z.; Feng, S.; Zhang, J.; Zhang, F.; Wang, W.; Hu, H.; Zhang, W.; Bao, M. The C2H2-Type Zinc Finger Protein PhZFP1 Regulates Cold Stress Tolerance by Modulating Galactinol Synthesis in Petunia Hybrida. Journal of Experimental Botany 2022, 73 (18), 6434–6448, https://doi.org/10.1093/jxb/erac274.
	Peb08661	2	C2H2	Zinc finger protein 1 OS=Arabidopsis thaliana GN=ZFP1 PE=2 SV=1
	Peb31426	2	C2H2
	Peb20557	4	C2H2	Zinc finger protein MAGPIE OS=Arabidopsis thaliana GN=MGP PE=1 SV=1
	Peb22408	4	CO-like	Zinc finger protein CONSTANS-LIKE 16 OS=Arabidopsis thaliana GN=COL16 PE=2 SV=2
	Peb15372	1	CPP	CRC domain-containing protein TSO1 OS=Arabidopsis thaliana GN=TSO1 PE=1 SV=1
	Peb10844	2	DBP	Probable protein phosphatase 2C 22 OS=Arabidopsis thaliana GN=At2g25620 PE=2 SV=1
	Peb12940	1	Dof	Dof zinc finger protein DOF5.3 OS=Arabidopsis thaliana GN=DOF5.3 PE=2 SV=1	Regulating sucrose biosynthesis	21. Renau-Morata, B.; Molina, R. V.; Carrillo, L.; Cebolla-Cornejo, J.; Sánchez-Perales, M.; Pollmann, S.; Domínguez-Figueroa, J.; Corrales, A. R.; Flexas, J.; Vicente-Carbajosa, J.; et al. Ectopic Expression of CDF3 Genes in Tomato Enhances Biomass Production and Yield under Salinity Stress Conditions. Front. Plant Sci. 2017, 8, 660, https://doi.org/10.3389/fpls.2017.00660.
	Peb04204	1	Dof	Dof zinc finger protein DOF5.3 OS=Arabidopsis thaliana GN=DOF5.3 PE=2 SV=1
	Peb15442	3	Dof	Dof zinc finger protein DOF3.5 OS=Arabidopsis thaliana GN=DOF3.5 PE=3 SV=1
	Peb26353	1	Dof	Dof zinc finger protein DOF3.4 OS=Arabidopsis thaliana GN=DOF3.4 PE=1 SV=2
	Peb30135	2	Dof	Dof zinc finger protein DOF5.6 OS=Arabidopsis thaliana GN=DOF5.6 PE=2 SV=2
	Peb24888	4	GARP	Myb family transcription factor APL OS=Arabidopsis thaliana GN=APL PE=2 SV=2
	Peb19366	4	GARP	Myb family transcription factor APL OS=Arabidopsis thaliana GN=APL PE=2 SV=2
	Peb12370	3	GARP	Transcription factor LUX OS=Arabidopsis thaliana GN=LUX PE=1 SV=1
	Peb14374	4	GARP	Protein PHR1-LIKE 1 OS=Arabidopsis thaliana GN=PHL1 PE=1 SV=1
	Peb20541	4	GARP	Transcription activator GLK1 OS=Arabidopsis thaliana GN=GLK1 PE=1 SV=2
	Peb19418	4	GARP	Transcription factor PCL1 OS=Oryza sativa subsp. japonica GN=PCL1 PE=2 SV=1
	Peb27778	2	GATA	GATA transcription factor 11 OS=Arabidopsis thaliana GN=GATA11 PE=2 SV=1
	Peb15445	2	GATA	GATA transcription factor 11 OS=Arabidopsis thaliana GN=GATA11 PE=2 SV=1
	Peb17118	2	GATA	GATA transcription factor 5 OS=Arabidopsis thaliana GN=GATA5 PE=2 SV=1
	Peb30315	4	GRAS	Scarecrow-like protein 9 OS=Arabidopsis thaliana GN=SCL9 PE=2 SV=1
	Peb16420	2	GRAS	Scarecrow-like protein 32 OS=Arabidopsis thaliana GN=SCL32 PE=2 SV=1
	Peb01917	1	GRF	Growth-regulating factor 5 OS=Arabidopsis thaliana GN=GRF5 PE=1 SV=1	Modulating glucose biosynthesis pathways	22. Liu, Y.; Yan, J.; Wang, K.; Li, D.; Yang, R.; Luo, H.; Zhang, W. MiR396‐ GRF Module Associates with Switchgrass Biomass Yield and Feedstock Quality. Plant Biotechnol J 2021, 19 (8), 1523–1536, https://doi.org/10.1111/pbi.13567.
	Peb04551	1	GRF	Growth-regulating factor 4 OS=Oryza sativa subsp. japonica GN=GRF4 PE=2 SV=1
	Peb26734	1	HB-BELL	BEL1-like homeodomain protein 4 OS=Arabidopsis thaliana GN=BLH4 PE=1 SV=2
	Peb06271	1	HB-other	Homeobox-leucine zipper protein ATHB-52 OS=Arabidopsis thaliana GN=ATHB-52 PE=2 SV=1
	Peb22315	4	HB-other	Protein OVEREXPRESSOR OF CATIONIC PEROXIDASE 3 OS=Arabidopsis thaliana GN=OCP3 PE=1 SV=1
	Peb01899	4	HB-other	Protein OVEREXPRESSOR OF CATIONIC PEROXIDASE 3 OS=Arabidopsis thaliana GN=OCP3 PE=1 SV=1
	Peb29828	1	HSF	Heat shock factor protein HSF30 OS=Solanum peruvianum GN=HSF30 PE=2 SV=1
	Peb07611	4	LOB	LOB domain-containing protein 37 OS=Arabidopsis thaliana GN=LBD37 PE=2 SV=1
	Peb09496	4	LOB	LOB domain-containing protein 38 OS=Arabidopsis thaliana GN=LBD38 PE=2 SV=1
	Peb12752	3	NAC	Protein FEZ OS=Arabidopsis thaliana GN=FEZ PE=2 SV=1
	Peb13429	2	NAC	NAC domain-containing protein 7 OS=Arabidopsis thaliana GN=NAC007 PE=1 SV=2	Regulating sugar content	23. Wang, J.; Wang, Y.; Zhang, J.; Ren, Y.; Li, M.; Tian, S.; Yu, Y.; Zuo, Y.; Gong, G.; Zhang, H.; et al. The NAC Transcription Factor ClNAC68 Positively Regulates Sugar Content and Seed Development in Watermelon by Repressing ClINV and ClGH3.6. Horticulture Research 2021, 8, 214, https://doi.org/10.1038/s41438-021-00649-1.
	Peb07419	3	NAC	NAC domain-containing protein 21/22 OS=Arabidopsis thaliana GN=NAC021 PE=1 SV=2
	Peb05544	1	OFP	Transcription repressor OFP6 OS=Arabidopsis thaliana GN=OFP6 PE=1 SV=1
	Peb14479	1	OFP	Transcription repressor OFP8 OS=Arabidopsis thaliana GN=OFP8 PE=2 SV=1
	Peb15053	2	OFP	Transcription repressor OFP13 OS=Arabidopsis thaliana GN=OFP13 PE=2 SV=1
	Peb12439	2	OFP	Transcription repressor OFP3 OS=Arabidopsis thaliana GN=OFP3 PE=1 SV=1
	Peb28788	3	PLATZ
	Peb29935	1	SBP	Squamosa promoter-binding-like protein 9 OS=Arabidopsis thaliana GN=SPL9 PE=2 SV=2
	Peb17807	1	SBP	Squamosa promoter-binding-like protein 8 OS=Arabidopsis thaliana GN=SPL8 PE=1 SV=2
	Peb30319	1	SBP	Squamosa promoter-binding-like protein 9 OS=Arabidopsis thaliana GN=SPL9 PE=2 SV=2
	Peb12734	2	SBP	Squamosa promoter-binding-like protein 7 OS=Oryza sativa subsp. japonica GN=SPL7 PE=2 SV=2
	Peb08332	1	SBP	Squamosa promoter-binding-like protein 16 OS=Oryza sativa subsp. japonica GN=SPL16 PE=2 SV=1
	Peb18995	1	SBP	Squamosa promoter-binding protein 1 OS=Antirrhinum majus GN=SBP1 PE=2 SV=1
	Peb10690	2	SBP	Squamosa promoter-binding-like protein 16 OS=Oryza sativa subsp. japonica GN=SPL16 PE=2 SV=1
	Peb07814	4	Tify	Protein TIFY 6B OS=Arabidopsis thaliana GN=TIFY6B PE=1 SV=1
	Peb24823	4	Trihelix	Trihelix transcription factor GT-2 OS=Arabidopsis thaliana GN=GT-2 PE=2 SV=1
	Peb26126	1	Trihelix	Trihelix transcription factor GTL2 OS=Arabidopsis thaliana GN=At5g28300 PE=2 SV=1
	Peb24590	4	Trihelix	Trihelix transcription factor GTL1 OS=Arabidopsis thaliana GN=GTL1 PE=1 SV=2
	Peb13003	1	Trihelix	Trihelix transcription factor GT-2 OS=Arabidopsis thaliana GN=GT-2 PE=2 SV=1
	Peb18187	1	WRKY	WRKY transcription factor 22 OS=Arabidopsis thaliana GN=WRKY22 PE=2 SV=1
	Peb19742	4	WRKY	Probable WRKY transcription factor 69 OS=Arabidopsis thaliana GN=WRKY69 PE=2 SV=1	Promoting the expression of MdSWEET1; Regulating sugar accumulation	24. Sun, C.; Zhang, W.; Qu, H.; Yan, L.; Li, L.; Zhao, Y.; Yang, H.; Zhang, H.; Yao, G.; Hu, K. Comparative Physiological and Transcriptomic Analysis Reveal MdWRKY75 Associated with Sucrose Accumulation in Postharvest ‘Honeycrisp’ Apples with Bitter Pit. BMC Plant Biol 2022, 22 (1), 71, https://doi.org/10.1186/s12870-022-03453-8. 25. Huang, T.; Yu, D.; Wang, X. VvWRKY22 Transcription Factor Inter…
	Peb07457	4	WRKY	Probable WRKY transcription factor 57 OS=Arabidopsis thaliana GN=WRKY57 PE=2 SV=1
	Peb25150	2	WRKY	Probable WRKY transcription factor 23 OS=Arabidopsis thaliana GN=WRKY23 PE=2 SV=1
	Peb26625	2	zf-HD	Zinc-finger homeodomain protein 4 OS=Arabidopsis thaliana GN=ZHD4 PE=1 SV=1
Phenylpropanoid metabolic pathway	Peb09220	1	HD-ZIP	Homeobox-leucine zipper protein ATHB-15 OS=Arabidopsis thaliana GN=ATHB-15 PE=1 SV=1	Regulating flavonols biosynthesis; Participate in light regulation of flavonoid biosynthesis	26. Wang, Z.; Wang, S.; Xiao, Y.; Li, Z.; Wu, M.; Xie, X.; Li, H.; Mu, W.; Li, F.; Liu, P.; et al. Functional Characterization of a HD-ZIP IV Transcription Factor NtHDG2 in Regulating Flavonols Biosynthesis in Nicotiana Tabacum. Plant Physiology and Biochemistry 2020, 146, 259–268, https://doi.org/10.1016/j.plaphy.2019.11.033. 27. Zhang, X.; Jiang, X.; He, Y.; Li, L.; Xu, P.; Sun, Z.; Li, J.; Xu,…
	Peb07412	2	HD-ZIP	Homeobox-leucine zipper protein HDG11 OS=Arabidopsis thaliana GN=HDG11 PE=1 SV=1
	Peb26100	2	HD-ZIP	Homeobox-leucine zipper protein ROC3 OS=Oryza sativa subsp. indica GN=ROC3 PE=3 SV=2
	Peb04397	1	HD-ZIP	Homeobox-leucine zipper protein ROC3 OS=Oryza sativa subsp. indica GN=ROC3 PE=3 SV=2
	Peb27346	1	HD-ZIP	Homeobox-leucine zipper protein HAT5 OS=Arabidopsis thaliana GN=HAT5 PE=1 SV=1
	Peb05272	2	HD-ZIP	Homeobox-leucine zipper protein REVOLUTA OS=Arabidopsis thaliana GN=REV PE=1 SV=2
	Peb07454	2	HD-ZIP	Homeobox-leucine zipper protein MERISTEM L1 OS=Arabidopsis thaliana GN=ATML1 PE=2 SV=1
	Peb21621	2	HD-ZIP	Homeobox-leucine zipper protein HDG1 OS=Arabidopsis thaliana GN=HDG1 PE=2 SV=1
	Peb20356	2	HD-ZIP	Homeobox-leucine zipper protein HDG11 OS=Arabidopsis thaliana GN=HDG11 PE=1 SV=1
	Peb15048	1	MYB	Transcription factor MYB23 OS=Arabidopsis thaliana GN=MYB23 PE=1 SV=1	Regulating flavonol biosynthesis; Positively regulates the generation of flavonoids; Upregulating CHS, F3H, and FLS genes	11. Lin, S.; Singh, R. K.; Moehninsi; Navarre, D. A. R2R3-MYB Transcription Factors, StmiR858 and Sucrose Mediate Potato Flavonol Biosynthesis. Hortic Res 2021, 8 (1), 25, https://doi.org/10.1038/s41438-021-00463-9. 28. Yang, J.; Wu, X.; Aucapiña, C. B.; Zhang, D.; Huang, J.; Hao, Z.; Zhang, Y.; Ren, Y.; Miao, Y. NtMYB12 Requires for Competition between Flavonol and (pro)Anthocyanin Biosynthesis …
	Peb27174	1	MYB	Myb-related protein Myb4 OS=Oryza sativa subsp. japonica GN=MYB4 PE=2 SV=2
	Peb15330	1	MYB	Transcription repressor MYB5 OS=Arabidopsis thaliana GN=MYB5 PE=1 SV=1
	Peb14518	1	MYB	Transcription factor MYB86 OS=Arabidopsis thaliana GN=MYB86 PE=2 SV=1
	Peb12576	1	MYB	Transcription factor MYB108 OS=Arabidopsis thaliana GN=MYB108 PE=1 SV=1
	Peb30170	1	MYB	Transcription factor MYB86 OS=Arabidopsis thaliana GN=MYB86 PE=2 SV=1
	Peb00539	1	MYB	Transcription factor MYB44 OS=Arabidopsis thaliana GN=MYB44 PE=2 SV=1
	Peb20650	1	MYB	Myb-related protein Myb4 OS=Oryza sativa subsp. japonica GN=MYB4 PE=2 SV=2
	Peb08298	1	GRF	Growth-regulating factor 3 OS=Oryza sativa subsp. japonica GN=GRF3 PE=3 SV=2	Regulating the biosynthesis of flavonoid	34. Zhao, S.; Mi, X.; Guo, R.; Xia, X.; Liu, L.; An, Y.; Yan, X.; Wang, S.; Guo, L.; Wei, C. The Biosynthesis of Main Taste Compounds Is Coordinately Regulated by MiRNAs and Phytohormones in Tea Plant ( Camellia Sinensis ). J. Agric. Food Chem. 2020, 68 (22), 6221–6236, https://doi.org/10.1021/acs.jafc.0c01833.
	Peb04551	1	GRF	Growth-regulating factor 4 OS=Oryza sativa subsp. japonica GN=GRF4 PE=2 SV=1
	Peb13839	2	GRF	Growth-regulating factor 1 OS=Arabidopsis thaliana GN=GRF1 PE=1 SV=1
	Peb20912	1	GRF	Growth-regulating factor 1 OS=Arabidopsis thaliana GN=GRF1 PE=1 SV=1
	Peb17202	1	GRF	Growth-regulating factor 5 OS=Arabidopsis thaliana GN=GRF5 PE=1 SV=1
	Peb01917	1	GRF	Growth-regulating factor 5 OS=Arabidopsis thaliana GN=GRF5 PE=1 SV=1
	Peb07540	2	WRKY	Probable WRKY transcription factor 7 OS=Arabidopsis thaliana GN=WRKY7 PE=2 SV=1	Promoting the expression of PAL and 4CL; Regulating accumulation of flavonoids; Regulating flavonol biosynthesis	35. Zhang, L.; Wu, D.; Zhang, W.; Shu, H.; Sun, P.; Huang, C.; Deng, Q.; Wang, Z.; Cheng, S. Genome-Wide Identification of WRKY Gene Family and Functional Characterization of CcWRKY25 in Capsicum Chinense. International Journal of Molecular Sciences 2023, 24 (14), 11389, https://doi.org/10.3390/ijms241411389. 36. Wang, L.; Guo, D.; Zhao, G.; Wang, J.; Zhang, S.; Wang, C.; Guo, X. Group IIC WRKY T…
	Peb20753	1	WRKY	Probable WRKY transcription factor 12 OS=Arabidopsis thaliana GN=WRKY12 PE=2 SV=1
	Peb25150	2	WRKY	Probable WRKY transcription factor 23 OS=Arabidopsis thaliana GN=WRKY23 PE=2 SV=1
	Peb05804	2	WRKY	Probable WRKY transcription factor 48 OS=Arabidopsis thaliana GN=WRKY48 PE=2 SV=1
	Peb18187	1	WRKY	WRKY transcription factor 22 OS=Arabidopsis thaliana GN=WRKY22 PE=2 SV=1
	Peb07063	1	zf-HD	Zinc-finger homeodomain protein 11 OS=Arabidopsis thaliana GN=ZHD11 PE=1 SV=1
	Peb24583	2	Trihelix	Trihelix transcription factor PTL OS=Arabidopsis thaliana GN=PTL PE=2 SV=1
	Peb31616	2	TCP	Transcription factor TCP12 OS=Arabidopsis thaliana GN=TCP12 PE=2 SV=1	Promoting flavonoid biosynthesis	39. Li, S.; Zachgo, S. TCP3 Interacts with R2R3-MYB Proteins, Promotes Flavonoid Biosynthesis and Negatively Regulates the Auxin Response in Arabidopsis Thaliana. Plant J 2013, 76 (6), 901–913, https://doi.org/10.1111/tpj.12348.
	Peb22435	1	TCP	Transcription factor TCP12 OS=Arabidopsis thaliana GN=TCP12 PE=2 SV=1
	Peb17094	2	SRS	Protein SHORT INTERNODES OS=Arabidopsis thaliana GN=SHI PE=1 SV=1
	Peb07561	1	SBP	Squamosa promoter-binding-like protein 13B OS=Arabidopsis thaliana GN=SPL13B PE=3 SV=1
	Peb17807	1	SBP	Squamosa promoter-binding-like protein 8 OS=Arabidopsis thaliana GN=SPL8 PE=1 SV=2
	Peb30234	1	NAC	Protein NTM1-like 9 OS=Arabidopsis thaliana GN=NTL9 PE=1 SV=1
	Peb29251	2	NAC	NAC domain-containing protein 86 OS=Arabidopsis thaliana GN=NAC086 PE=2 SV=1
	Peb20931	1	NAC	NAC domain-containing protein 2 OS=Arabidopsis thaliana GN=NAC002 PE=2 SV=2
	Peb15828	2	NAC	NAC domain-containing protein 86 OS=Arabidopsis thaliana GN=NAC086 PE=2 SV=1
	Peb01336	1	MADS-MIKC	Floral homeotic protein APETALA 1 OS=Sinapis alba GN=AP1 PE=2 SV=1	Negatively regulating flavonoid biosynthesis	40. Qi, F.; Liu, Y.; Luo, Y.; Cui, Y.; Lu, C.; Li, H.; Huang, H.; Dai, S. Functional Analysis of the ScAG and ScAGL11 MADS-Box Transcription Factors for Anthocyanin Biosynthesis and Bicolour Pattern Formation in Senecio Cruentus Ray Florets. Horticulture Research 2022, 9, uhac071, https://doi.org/10.1093/hr/uhac071.
	Peb05646	1	LSD	Vacuolar protein sorting-associated protein 2 homolog 2 OS=Arabidopsis thaliana GN=VPS2.2 PE=1 SV=2
	Peb00540	1	HSF	Heat stress transcription factor B-4 OS=Arabidopsis thaliana GN=HSFB4 PE=2 SV=1	Regulating flavonoid accumulation; Regulating flavonoid biosynthesis by HSF-JAZ modul	41. Bian, X.; Li, W.; Niu, C.; Wei, W.; Hu, Y.; Han, J.; Lu, X.; Tao, J.; Jin, M.; Qin, H.; et al. A Class B Heat Shock Factor Selected for during Soybean Domestication Contributes to Salt Tolerance by Promoting Flavonoid Biosynthesis. New Phytol 2020, 225 (1), 268–283, https://doi.org/10.1111/nph.16104. 42. Zhang, X.; Li, L.; He, Y.; Lang, Z.; Zhao, Y.; Tao, H.; Li, Q.; Hong, G. The CsHSFA‐CsJAZ…
	Peb29828	1	HSF	Heat shock factor protein HSF30 OS=Solanum peruvianum GN=HSF30 PE=2 SV=1
	Peb06271	1	HB-other	Homeobox-leucine zipper protein ATHB-52 OS=Arabidopsis thaliana GN=ATHB-52 PE=2 SV=1
	Peb23847	2	Dof	Dof zinc finger protein DOF5.3 OS=Arabidopsis thaliana GN=DOF5.3 PE=2 SV=1
	Peb26353	1	Dof	Dof zinc finger protein DOF3.4 OS=Arabidopsis thaliana GN=DOF3.4 PE=1 SV=2
	Peb04204	1	Dof	Dof zinc finger protein DOF5.3 OS=Arabidopsis thaliana GN=DOF5.3 PE=2 SV=1
	Peb27343	1	CPP	CRC domain-containing protein TSO1 OS=Arabidopsis thaliana GN=TSO1 PE=1 SV=1
	Peb14235	2	C3H	Zinc finger CCCH domain-containing protein 49 OS=Arabidopsis thaliana GN=At4g29190 PE=2 SV=1
	Peb10858	1	C3H	Zinc finger CCCH domain-containing protein 23 OS=Arabidopsis thaliana GN=At2g25900 PE=2 SV=1
	Peb05060	1	C3H	Zinc finger CCCH domain-containing protein 32 OS=Arabidopsis thaliana GN=At2g47850 PE=2 SV=2
	Peb27850	1	C2H2
	Peb08661	2	C2H2	Zinc finger protein 1 OS=Arabidopsis thaliana GN=ZFP1 PE=2 SV=1
	Peb02687	2	bZIP	ABSCISIC ACID-INSENSITIVE 5-like protein 4 OS=Arabidopsis thaliana GN=ABF1 PE=1 SV=1	Regulating the flavonoid accumulation	43. Zhang, F.; Huang, J.; Guo, H.; Yang, C.; Li, Y.; Shen, S.; Zhan, C.; Qu, L.; Liu, X.; Wang, S.; et al. OsRLCK160 Contributes to Flavonoid Accumulation and UV-B Tolerance by Regulating OsbZIP48 in Rice. Sci. China Life Sci. 2022, 65 (7), 1380–1394, https://doi.org/10.1007/s11427-021-2036-5.
	Peb03543	1	bZIP	TGACG-sequence-specific DNA-binding protein TGA-2.1 OS=Nicotiana tabacum GN=TGA21 PE=1 SV=1
	Peb05048	1	bHLH	Basic helix-loop-helix protein A OS=Pisum sativum GN=BHLH PE=3 SV=1	Up-Regulating Flavonoid Accumulation	44. Gao, Q.; Li, X.; Xiang, C.; Li, R.; Xie, H.; Liu, J.; Li, X.; Zhang, G.; Yang, S.; Liang, Y.; et al. EbbHLH80 Enhances Salt Responses by Up-Regulating Flavonoid Accumulation and Modulating ROS Levels. International Journal of Molecular Sciences 2023, 24 (13), 11080, https://doi.org/10.3390/ijms241311080.
	Peb28847	2	bHLH	Transcription factor GLABRA 3 OS=Arabidopsis thaliana GN=GL3 PE=1 SV=1
	Peb05079	2	bHLH	Transcription factor FER-LIKE IRON DEFICIENCY-INDUCED TRANSCRIPTION FACTOR OS=Arabidopsis thaliana GN=FIT PE=1 SV=1
	Peb04329	1	ARF	Auxin response factor 11 OS=Arabidopsis thaliana GN=ARF11 PE=2 SV=3
	Peb30913	2	B3	B3 domain-containing protein LOC_Os12g40080 OS=Oryza sativa subsp. japonica GN=Os12g0591400 PE=3 SV=1
	Peb27519	1	AP2/ERF-ERF	Dehydration-responsive element-binding protein 3 OS=Arabidopsis thaliana GN=DREB3 PE=2 SV=1
	Peb06453	1	AP2/ERF-ERF	Dehydration-responsive element-binding protein 3 OS=Arabidopsis thaliana GN=DREB3 PE=2 SV=1
	Peb02914	1	AP2/ERF-ERF	Ethylene-responsive transcription factor ERF034 OS=Arabidopsis thaliana GN=ERF034 PE=2 SV=2
	Peb12876	1	AP2/ERF-AP2	AP2-like ethylene-responsive transcription factor AIL7 OS=Arabidopsis thaliana GN=AIL7 PE=2 SV=2

## Sheet: Table S6
Table S5. Physilogical traits variation during the leaf development.
Traits	L2	L3	L4
Fresh weight (g)	1.05833	2.625	6.78333
Biomass (g)	0.16	0.298333	0.593333
Water content (%)	84.6467	88.5444	91.3446
Total acid content (mg/g)	1.69589	1.82251	2.07471
Total protein content (mg/g)	11.3403	17.2296	22.2513
Total starch content (mg/g)	39.1371	51.9416	54.1161
Total lignin content (mg/g)	31.0861	17.6555	11.333
